# Supplementary material for: A family of edge-sharing bi-octahedral diruthenium(iii,iii) compounds containing Ru–Ru single bonds
Source: Royal Society of Chemistry journal article supplement (doi:10.1039/d3dt01302b), 2023-01-01
Supplement: d3dt01302b1.pdf [file d3dt01302b1.pdf]

## Electronic Supporting Information (ESI)

### A Family of Edge-Sharing Bioctahedral Diruthenium(III,III)

#### Compounds Containing Ru-Ru Single Bond

Li-Xiang Guo, Yao Gao, Pei Zhang, Jian-Hui Yang and Bin Liu\*

*Key Laboratory of Synthetic and Natural Functional Molecule of the Ministry of Education, Xi'an Key Laboratory of Functional Supramolecular Structure and Materials, College of Chemistry and Materials Science, Northwest University, Xi'an 710127, P. R. China.*

**Table S1-1.** Crystallographic data and structure refinement details for compounds **1—4**.

| Compound                                                                                            | <b>1</b>                                                        | <b>2</b>                                                                       | <b>3</b>                                                                        | <b>4</b>                                                        |
|-----------------------------------------------------------------------------------------------------|-----------------------------------------------------------------|--------------------------------------------------------------------------------|---------------------------------------------------------------------------------|-----------------------------------------------------------------|
| Empirical formula                                                                                   | C <sub>16</sub> H <sub>26</sub> O <sub>10</sub> Ru <sub>2</sub> | C <sub>16</sub> H <sub>20</sub> F <sub>6</sub> O <sub>10</sub> Ru <sub>2</sub> | C <sub>18</sub> H <sub>18</sub> F <sub>12</sub> O <sub>10</sub> Ru <sub>2</sub> | C <sub>18</sub> H <sub>30</sub> O <sub>10</sub> Ru <sub>2</sub> |
| Formula weight                                                                                      | 580.51                                                          | 688.45                                                                         | 824.45                                                                          | 608.52                                                          |
| Temperature (K)                                                                                     | 200                                                             | 150                                                                            | 150                                                                             | 180                                                             |
| Wavelength (Å)                                                                                      | 1.34138                                                         | 1.34138                                                                        | 0.71073                                                                         | 0.71073                                                         |
| Crystal system                                                                                      | Monoclinic                                                      | Monoclinic                                                                     | Monoclinic                                                                      | Monoclinic                                                      |
| Space group                                                                                         | <i>P</i> 2 <sub>1</sub> / <i>c</i>                              | <i>P</i> 2 <sub>1</sub> / <i>c</i>                                             | <i>P</i> 2 <sub>1</sub> / <i>c</i>                                              | <i>P</i> 2 <sub>1</sub> / <i>c</i>                              |
| <i>a</i> [Å]                                                                                        | 7.494(7)                                                        | 7.9040(5)                                                                      | 8.6541(15)                                                                      | 7.8332(8)                                                       |
| <i>b</i> [Å]                                                                                        | 17.150(15)                                                      | 17.5442(11)                                                                    | 17.954(3)                                                                       | 17.5642(17)                                                     |
| <i>c</i> [Å]                                                                                        | 7.979(5)                                                        | 17.1910(10)                                                                    | 8.3730(14)                                                                      | 16.970(2)                                                       |
| $\beta$ [°]                                                                                         | 93.56(5)                                                        | 110.411(3)                                                                     | 94.844(8)                                                                       | 90.706(5)                                                       |
| <i>V</i> [Å <sup>3</sup> ]                                                                          | 1023.5(14)                                                      | 2234.2(2)                                                                      | 1296.3(4)                                                                       | 2334.6(4)                                                       |
| <i>Z</i>                                                                                            | 2                                                               | 4                                                                              | 2                                                                               | 4                                                               |
| $\rho_{\text{calcd}}$ [g·cm <sup>-3</sup> ]                                                         | 1.884                                                           | 2.407                                                                          | 2.112                                                                           | 1.731                                                           |
| $\mu$ [mm <sup>-1</sup> ]                                                                           | 8.402                                                           | 8.039                                                                          | 1.302                                                                           | 1.342                                                           |
| <i>F</i> (000)                                                                                      | 580                                                             | 1352                                                                           | 804                                                                             | 1224                                                            |
| GOF on <i>F</i> <sup>2</sup>                                                                        | 1.027                                                           | 1.053                                                                          | 1.074                                                                           | 0.999                                                           |
| Reflections collected                                                                               | 10077                                                           | 25020                                                                          | 13798                                                                           | 24011                                                           |
| Reflections unique                                                                                  | 1933                                                            | 4232                                                                           | 2475                                                                            | 4440                                                            |
| <i>R</i> <sub>(int)</sub>                                                                           | 0.0982                                                          | 0.0677                                                                         | 0.1162                                                                          | 0.1471                                                          |
| <i>R</i> <sub>1</sub> , <i>wR</i> <sub>2</sub> [ <i>I</i> > 2 $\sigma$ ( <i>I</i> )] <sup>[a]</sup> | 0.0458, 0.0970                                                  | 0.0368, 0.0926                                                                 | 0.0750, 0.1804                                                                  | 0.0590, 0.1409                                                  |
| <i>R</i> <sub>1</sub> , <i>wR</i> <sub>2</sub> <sup>a</sup> (all data)                              | 0.0859, 0.1152                                                  | 0.0535, 0.0985                                                                 | 0.1264, 0.2146                                                                  | 0.1070, 0.1643                                                  |
| ( $\Delta\rho$ ) <sub>max</sub> , ( $\Delta\rho$ ) <sub>min</sub> [e/Å <sup>3</sup> ]               | 0.782, -1.035                                                   | 0.816, -1.112                                                                  | 1.430, -2.284                                                                   | 1.277, -1.108                                                   |

**Table S1-2.** Crystallographic data and structure refinement details for compounds **5**–**8**.

| Compound                                                                                            | <b>5</b>                                                                       | <b>6</b>                                                                        | <b>7</b>                                                                                       | <b>8</b>                                                                                        |
|-----------------------------------------------------------------------------------------------------|--------------------------------------------------------------------------------|---------------------------------------------------------------------------------|------------------------------------------------------------------------------------------------|-------------------------------------------------------------------------------------------------|
| Empirical formula                                                                                   | C <sub>18</sub> H <sub>24</sub> F <sub>6</sub> O <sub>10</sub> Ru <sub>2</sub> | C <sub>20</sub> H <sub>22</sub> F <sub>12</sub> O <sub>10</sub> Ru <sub>2</sub> | C <sub>18</sub> H <sub>18</sub> Cl <sub>2</sub> F <sub>6</sub> O <sub>10</sub> Ru <sub>2</sub> | C <sub>18</sub> H <sub>16</sub> Cl <sub>2</sub> F <sub>12</sub> O <sub>10</sub> Ru <sub>2</sub> |
| Formula weight                                                                                      | 716.51                                                                         | 852.50                                                                          | 757.34                                                                                         | 893.34                                                                                          |
| Temperature (K)                                                                                     | 150                                                                            | 200                                                                             | 293                                                                                            | 180                                                                                             |
| Wavelength (Å)                                                                                      | 1.34138                                                                        | 0.71073                                                                         | 1.34138                                                                                        | 1.34138                                                                                         |
| Crystal system                                                                                      | Monoclinic                                                                     | Monoclinic                                                                      | Monoclinic                                                                                     | Monoclinic                                                                                      |
| Space group                                                                                         | <i>P2<sub>1</sub>/c</i>                                                        | <i>P2<sub>1</sub>/c</i>                                                         | <i>P2<sub>1</sub>/c</i>                                                                        | <i>P2<sub>1</sub>/c</i>                                                                         |
| <i>a</i> [Å]                                                                                        | 8.408(19)                                                                      | 8.7030(6)                                                                       | 9.314(15)                                                                                      | 8.7048(4)                                                                                       |
| <i>b</i> [Å]                                                                                        | 17.66(4)                                                                       | 18.5622(13)                                                                     | 17.92(3)                                                                                       | 18.4734(8)                                                                                      |
| <i>c</i> [Å]                                                                                        | 8.367(19)                                                                      | 8.6999(6)                                                                       | 8.011(15)                                                                                      | 8.7051(4)                                                                                       |
| $\beta$ [°]                                                                                         | 99.14(10)                                                                      | 98.218(3)                                                                       | 108.34(5)                                                                                      | 99.066(2)                                                                                       |
| <i>V</i> [Å <sup>3</sup> ]                                                                          | 1227(5)                                                                        | 1391.01(17)                                                                     | 1269(4)                                                                                        | 1382.36                                                                                         |
| <i>Z</i>                                                                                            | 2                                                                              | 2                                                                               | 2                                                                                              | 2                                                                                               |
| $\rho_{\text{calcd}}$ [g·cm <sup>-3</sup> ]                                                         | 1.939                                                                          | 2.035                                                                           | 1.982                                                                                          | 2.146                                                                                           |
| $\mu$ [mm <sup>-1</sup> ]                                                                           | 7.340                                                                          | 1.217                                                                           | 8.388                                                                                          | 7.993                                                                                           |
| <i>F</i> (000)                                                                                      | 708                                                                            | 836                                                                             | 740                                                                                            | 868                                                                                             |
| GOF on <i>F</i> <sup>2</sup>                                                                        | 1.068                                                                          | 1.077                                                                           | 1.083                                                                                          | 1.046                                                                                           |
| Reflections collected                                                                               | 11804                                                                          | 32286                                                                           | 11642                                                                                          | 17502                                                                                           |
| Reflections unique                                                                                  | 2313                                                                           | 2627                                                                            | 2398                                                                                           | 2613                                                                                            |
| <i>R</i> <sub>(int)</sub>                                                                           | 0.1381                                                                         | 0.0964                                                                          | 0.1417                                                                                         | 0.0459                                                                                          |
| <i>R</i> <sub>1</sub> , <i>wR</i> <sub>2</sub> [ <i>I</i> > 2 $\sigma$ ( <i>I</i> )] <sup>[a]</sup> | 0.0899, 0.2169                                                                 | 0.0423, 0.0925                                                                  | 0.0740, 0.1919                                                                                 | 0.0272, 0.0693                                                                                  |
| <i>R</i> <sub>1</sub> , <i>wR</i> <sub>2</sub> <sup>a</sup> (all data)                              | 0.1153, 0.2306                                                                 | 0.0598, 0.1020                                                                  | 0.1567, 0.2295                                                                                 | 0.0298, 0.0707                                                                                  |
| ( $\Delta\rho$ ) <sub>max</sub> , ( $\Delta\rho$ ) <sub>min</sub> [e/Å <sup>3</sup> ]               | 1.692, -1.876                                                                  | 0.719, -1.285                                                                   | 1.212, -1.428                                                                                  | 0.718, -0.813                                                                                   |

**Table S1-3.** Crystallographic data and structure refinement details for compounds **9** and **10**

| Compound                   | <b>9</b>                                                                       | <b>10</b>                                                       |
|----------------------------|--------------------------------------------------------------------------------|-----------------------------------------------------------------|
| Empirical formula          | C <sub>26</sub> H <sub>24</sub> F <sub>6</sub> O <sub>10</sub> Ru <sub>2</sub> | C <sub>14</sub> H <sub>22</sub> O <sub>10</sub> Ru <sub>2</sub> |
| Formula weight             | 812.59                                                                         | 552.46                                                          |
| Temperature (K)            | 294                                                                            | 180                                                             |
| Wavelength (Å)             | 1.34138                                                                        | 1.34138                                                         |
| Crystal system             | Triclinic                                                                      | Monoclinic                                                      |
| Space group                | <i>P</i> $\bar{1}$                                                             | <i>P2<sub>1</sub>/c</i>                                         |
| <i>a</i> [Å]               | 11.899(4)                                                                      | 9.6719(9)                                                       |
| <i>b</i> [Å]               | 14.482(4)                                                                      | 7.1673(5)                                                       |
| <i>c</i> [Å]               | 15.387(4)                                                                      | 14.9572(9)                                                      |
| $\alpha$ [°]               | 65.673(8)                                                                      | 90                                                              |
| $\beta$ [°]                | 87.772(9)                                                                      | 119.200(5)                                                      |
| $\gamma$ [°]               | 75.159(10)                                                                     | 90                                                              |
| <i>V</i> [Å <sup>3</sup> ] | 2328.8(12)                                                                     | 905.09(13)                                                      |
| <i>Z</i>                   | 3                                                                              | 2                                                               |

|                                                                            |                |                |
|----------------------------------------------------------------------------|----------------|----------------|
| $\rho_{\text{calcd}}$ [g·cm <sup>-3</sup> ]                                | 1.738          | 2.027          |
| $\mu$ [mm <sup>-1</sup> ]                                                  | 5.858          | 9.476          |
| $F(000)$                                                                   | 1206           | 548            |
| GOF on $F^2$                                                               | 1.038          | 1.144          |
| Reflections collected                                                      | 29572          | 6507           |
| Reflections unique                                                         | 8756           | 1605           |
| $R_{\text{(int)}}$                                                         | 0.0435         | 0.0287         |
| $R_1, wR_2$ [ $I > 2\sigma(I)$ ] <sup>[a]</sup>                            | 0.0478, 0.1336 | 0.0312, 0.0816 |
| $R_1, wR_2$ <sup>a</sup> (all data)                                        | 0.0525, 0.1366 | 0.0315, 0.0818 |
| $(\Delta\rho)_{\text{max}}, (\Delta\rho)_{\text{min}}$ [e/Å <sup>3</sup> ] | 1.260, -0.742  | 0.721, -0.712  |

$$[a] R_1 = \frac{\sum |F_o| - |F_c|}{\sum |F_o|}; wR_2 = \frac{[\sum w(F_o^2 - F_c^2)^2 / \sum w(F_o^2)^2]^{1/2}}$$

**Table S2-1.** Selected bond distances (Å) and angles (°) for compound **1**

| Selected bond distances (Å) |            |                      |           |
|-----------------------------|------------|----------------------|-----------|
| Ru(1)-Ru(1)#1               | 2.476(2)   | O(3)-C(6)            | 1.284(9)  |
| Ru(1)-O(5)                  | 1.999(5)   | O(4)-C(6)            | 1.271(9)  |
| Ru(1)-O(1)                  | 2.021(5)   | O(5)-C(8)            | 1.434(8)  |
| Ru(1)-O(2)                  | 2.020(5)   | C(1)-C(2)            | 1.376(10) |
| Ru(1)-O(3)                  | 2.081(5)   | C(1)-C(3)            | 1.403(10) |
| Ru(1)-O(4)#1                | 2.080(5)   | C(2)-C(4)            | 1.516(10) |
| Ru(1)-O(5)#1                | 1.998(5)   | C(3)-C(5)            | 1.493(10) |
| O(1)-C(2)                   | 1.278(9)   | C(6)-C(7)            | 1.499(10) |
| O(2)-C(3)                   | 1.275(9)   |                      |           |
| Selected angles (°)         |            |                      |           |
| O(5)-Ru(1)-O(5)#1           | 103.4(2)   | O(3)-Ru(1)-Ru(1)#1   | 87.50(15) |
| O(5)-Ru(1)-O(1)             | 170.4(2)   | O(4)#1-Ru(1)-Ru(1)#1 | 87.05(15) |
| O(5)#1-Ru(1)-O(1)           | 84.1(2)    | C(2)-O(1)-Ru(1)      | 125.0(4)  |
| O(5)-Ru(1)-O(2)             | 82.8(2)    | C(3)-O(2)-Ru(1)      | 125.6(4)  |
| O(5)#1-Ru(1)-O(2)           | 170.7(2)   | C(6)-O(3)-Ru(1)      | 119.0(4)  |
| O(1)-Ru(1)-O(2)             | 90.4(2)    | C(6)-O(4)-Ru(1)#1    | 119.9(5)  |
| O(5)-Ru(1)-O(3)             | 83.69(19)  | C(8)-O(5)-Ru(1)      | 122.8(4)  |
| O(5)#1-Ru(1)-O(3)           | 93.2(2)    | C(8)-O(5)-Ru(1)#1    | 124.1(4)  |
| O(1)-Ru(1)-O(3)             | 90.08(19)  | Ru(1)-O(5)-Ru(1)#1   | 76.56(18) |
| O(2)-Ru(1)-O(3)             | 94.3(2)    | C(2)-C(1)-C(3)       | 124.8(7)  |
| O(5)-Ru(1)-O(4)#1           | 93.0(2)    | O(1)-C(2)-C(1)       | 127.5(6)  |
| O(5)#1-Ru(1)-O(4)#1         | 83.3(2)    | O(1)-C(2)-C(4)       | 113.8(6)  |
| O(1)-Ru(1)-O(4)#1           | 93.73(19)  | C(1)-C(2)-C(4)       | 118.7(6)  |
| O(2)-Ru(1)-O(4)#1           | 89.6(2)    | O(2)-C(3)-C(1)       | 125.8(6)  |
| O(3)-Ru(1)-O(4)#1           | 174.6(2)   | O(2)-C(3)-C(5)       | 114.5(6)  |
| O(5)-Ru(1)-Ru(1)#1          | 51.69(16)  | C(1)-C(3)-C(5)       | 119.7(6)  |
| O(5)#1-Ru(1)-Ru(1)#1        | 51.75(15)  | O(4)-C(6)-O(3)       | 126.2(6)  |
| O(1)-Ru(1)-Ru(1)#1          | 135.51(15) | O(4)-C(6)-C(7)       | 117.1(6)  |
| O(2)-Ru(1)-Ru(1)#1          | 134.05(14) | O(3)-C(6)-C(7)       | 116.7(6)  |

Symmetry transformations used to generate equivalent atoms: #1 -x+1, -y+1, -z+1

**Table S2-2.** Selected bond distances (Å) and angles (°) for compound **2**

| Selected bond distances (Å) |            |                   |           |
|-----------------------------|------------|-------------------|-----------|
| Ru(1)-Ru(2)                 | 2.4663(5)  | O(8)-C(10)        | 1.278(6)  |
| Ru(1)-O(1)                  | 1.987(3)   | O(9)-C(13)        | 1.275(6)  |
| Ru(1)-O(2)                  | 1.991(3)   | O(10)-C(15)       | 1.272(6)  |
| Ru(1)-O(7)                  | 2.023(3)   | C(3)-C(4)         | 1.483(8)  |
| Ru(1)-O(8)                  | 2.024(3)   | C(5)-C(6)         | 1.513(8)  |
| Ru(1)-O(5)                  | 2.072(3)   | C(7)-C(8)         | 1.499(7)  |
| Ru(1)-O(3)                  | 2.079(3)   | C(8)-C(9)         | 1.410(7)  |
| Ru(2)-O(1)                  | 1.988(3)   | C(9)-C(10)        | 1.375(7)  |
| Ru(2)-O(2)                  | 1.986(3)   | C(10)-C(11)       | 1.527(7)  |
| Ru(2)-O(4)                  | 2.058(3)   | C(12)-C(13)       | 1.513(7)  |
| Ru(2)-O(6)                  | 2.062(3)   | C(13)-C(14)       | 1.412(7)  |
| Ru(2)-O(9)                  | 2.014(3)   | C(14)-C(15)       | 1.363(7)  |
| Ru(2)-O(10)                 | 2.031(3)   | C(15)-C(16)       | 1.510(7)  |
| O(1)-C(1)                   | 1.446(6)   | F(1)-C(11)        | 1.324(6)  |
| O(2)-C(2)                   | 1.440(6)   | F(2)-C(11)        | 1.320(7)  |
| O(3)-C(3)                   | 1.272(6)   | F(3)-C(11)        | 1.320(7)  |
| O(4)-C(3)                   | 1.289(6)   | F(4)-C(16)        | 1.327(6)  |
| O(5)-C(5)                   | 1.269(6)   | F(5)-C(16)        | 1.356(6)  |
| O(6)-C(5)                   | 1.274(6)   | F(6)-C(16)        | 1.339(7)  |
| O(7)-C(8)                   | 1.281(6)   |                   |           |
| Selected angles (°)         |            |                   |           |
| Ru(2)-Ru(1)-O(1)            | 51.67(9)   | Ru(2)-O(1)-C2(1)  | 123.6(3)  |
| Ru(2)-Ru(1)-O(2)            | 51.59(9)   | Ru(1)-O(2)-Ru(2)  | 76.65(11) |
| Ru(2)-Ru(1)-O(3)            | 86.94(8)   | Ru(1)-O(2)-C(2)   | 122.2(3)  |
| Ru(2)-Ru(1)-O(5)            | 87.33(9)   | Ru(2)-O(2)-C(2)   | 123.0(3)  |
| Ru(2)-Ru(1)-O(7)            | 135.11(9)  | Ru(1)-O(3)-C(3)   | 119.8(3)  |
| Ru(2)-Ru(1)-O(8)            | 134.84(9)  | Ru(2)-O(4)-C(3)   | 119.5(3)  |
| O(1)-Ru(1)-O(2)             | 103.26(13) | Ru(1)-O(5)-C(5)   | 119.3(3)  |
| O(1)-Ru(1)-O(3)             | 84.12(13)  | Ru(2)-O(6)-C(5)   | 119.8(3)  |
| O(1)-Ru(1)-O(5)             | 92.05(13)  | Ru(1)-O(7)-C(8)   | 127.4(3)  |
| O(1)-Ru(1)-O(7)             | 83.75(12)  | Ru(1)-O(8)-C(10)  | 124.1(3)  |
| O(1)-Ru(1)-O(8)             | 171.27(13) | Ru(2)-O(9)-C(13)  | 127.3(3)  |
| O(2)-Ru(1)-O(3)             | 92.36(13)  | Ru(2)-O(10)-C(15) | 123.5(3)  |
| O(2)-Ru(1)-O(5)             | 84.33(13)  | O(3)-C(3)-O(4)    | 125.7(5)  |
| O(2)-Ru(1)-O(7)             | 170.83(14) | O(3)-C(3)-C(4)    | 117.6(4)  |
| O(2)-Ru(1)-O(8)             | 83.58(12)  | O(4)-C(3)-C(4)    | 116.7(4)  |
| O(3)-Ru(1)-O(5)             | 174.25(12) | O(5)-C(5)-O(6)    | 126.4(5)  |
| O(3)-Ru(1)-O(7)             | 94.27(13)  | O(5)-C(5)-C(6)    | 116.8(5)  |
| O(3)-Ru(1)-O(8)             | 90.23(13)  | O(6)-C(5)-C(6)    | 116.8(4)  |
| O(5)-Ru(1)-O(7)             | 89.57(13)  | O(7)-C(8)-C(7)    | 116.6(4)  |

|                   |            |                   |          |
|-------------------|------------|-------------------|----------|
| O(5)-Ru(1)-O(8)   | 94.05(13)  | O(7)-C(8)-C(9)    | 124.3(5) |
| O(7)-Ru(1)-O(8)   | 90.05(12)  | C(7)-C(8)-C(9)    | 119.1(5) |
| Ru(1)-Ru(2)-O(1)  | 51.62(9)   | C(8)-C(9)-C(10)   | 124.4(5) |
| Ru(1)-Ru(2)-O(2)  | 51.76(9)   | O(8)-C(10)-C(9)   | 129.2(5) |
| Ru(1)-Ru(2)-O(4)  | 87.85(9)   | O(8)-C(10)-C(11)  | 111.3(4) |
| Ru(1)-Ru(2)-O(6)  | 87.22(9)   | C(9)-C(10)-C(11)  | 119.5(5) |
| Ru(1)-Ru(2)-O(9)  | 134.95(9)  | F(1)-C(11)-F(2)   | 107.0(5) |
| Ru(1)-Ru(2)-O(10) | 134.95(9)  | F(1)-C(11)-F(3)   | 106.4(4) |
| O(1)-Ru(2)-O(2)   | 103.39(13) | F(1)-C(11)-C(10)  | 113.5(4) |
| O(1)-Ru(2)-O(4)   | 84.02(13)  | F(2)-C(11)-F(3)   | 106.8(4) |
| O(1)-Ru(2)-O(6)   | 92.24(13)  | F(2)-C(11)-C(10)  | 112.6(4) |
| O(1)-Ru(2)-O(9)   | 83.54(13)  | F(3)-C(11)-C(10)  | 110.2(4) |
| O(1)-Ru(2)-O(10)  | 170.90(14) | O(9)-C(13)-C(12)  | 115.6(4) |
| O(2)-Ru(2)-O(4)   | 93.62(13)  | O(9)-C(13)-C(14)  | 124.9(4) |
| O(2)-Ru(2)-O(6)   | 84.01(13)  | C(12)-C(13)-C(14) | 119.6(5) |
| O(2)-Ru(2)-O(9)   | 171.48(13) | C(13)-C(14)-C(15) | 124.0(5) |
| O(2)-Ru(2)-O(10)  | 83.57(13)  | O(10)-C(15)-C(14) | 129.7(5) |
| O(4)-Ru(2)-O(6)   | 175.00(12) | O(10)-C(15)-C(16) | 111.9(4) |
| O(4)-Ru(2)-O(9)   | 92.03(13)  | C(14)-C(15)-C(16) | 118.4(5) |
| O(4)-Ru(2)-O(10)  | 89.74(13)  | F(4)-C(16)-F(5)   | 105.4(4) |
| O(6)-Ru(2)-O(9)   | 90.84(13)  | F(4)-C(16)-C(6)   | 107.6(4) |
| O(6)-Ru(2)-O(10)  | 94.36(13)  | F(4)-C(16)-C(15)  | 114.5(4) |
| O(9)-Ru(2)-O(10)  | 90.08(13)  | F(5)-C(16)-F(6)   | 105.5(4) |
| Ru(1)-O(1)-Ru(2)  | 76.70(11)  | F(5)-C(16)-C(15)  | 110.4(4) |
| Ru(1)-O(1)-C(1)   | 123.3(3)   | F(6)-C(16)-C(15)  | 112.8(4) |

**Table S2-3.** Selected bond distances (Å) and angles (°) for compound **3**

| Selected bond distances (Å) |           |                  |           |
|-----------------------------|-----------|------------------|-----------|
| Ru(1)-Ru(1)#1               | 2.4560(9) | O(5)-C(8)        | 1.258(10) |
| Ru(1)-O(3)                  | 1.983(6)  | C(1)-C(2)        | 1.492(15) |
| Ru(1)-O(4)                  | 2.026(6)  | C(3)-C(4)        | 1.455(16) |
| Ru(1)-O(5)                  | 2.030(6)  | C(5)-F(5)        | 1.290(11) |
| Ru(1)-O(1)                  | 2.065(7)  | C(5)-F(6)        | 1.290(12) |
| Ru(1)-O(2)                  | 2.073(7)  | C(5)-F(4)        | 1.298(13) |
| Ru(1)-O(3)#1                | 1.991(6)  | C(5)-C(6)        | 1.540(13) |
| O(1)-C(1)#1                 | 1.271(11) | C(6)-C(7)        | 1.370(14) |
| O(2)-C(1)                   | 1.270(11) | C(7)-C(8)        | 1.390(13) |
| O(3)-C(3)                   | 1.474(10) | C(8)-C(9)        | 1.513(14) |
| O(4)-C(6)                   | 1.268(10) |                  |           |
| Selected angles (°)         |           |                  |           |
| O(3)-Ru(1)-O(3)#1           | 103.7(2)  | C(6)-O(4)-Ru(1)  | 76.4(2)   |
| O(3)-Ru(1)-O(4)             | 171.9(3)  | C(8)-O(5)-Ru(1)  | 125.8(6)  |
| O(3)#1-Ru(1)-O(4)           | 83.3(2)   | O(1)#1-C(1)-O(2) | 126.3(6)  |
| O(3)-Ru(1)-O(5)             | 84.4(2)   | O(1)#1-C(1)-C(2) | 126.2(9)  |

|                      |            |                |           |
|----------------------|------------|----------------|-----------|
| O(3)#1-Ru(1)-O(5)    | 171.0(2)   | O(2)-C(1)-C(2) | 116.7(9)  |
| O(4)-Ru(1)-O(5)      | 88.9(2)    | C(4)-C(3)-O(3) | 117.1(8)  |
| O(3)-Ru(1)-O(1)      | 84.2(2)    | F(5)-C(5)-F(6) | 110.3(9)  |
| O(3)#1-Ru(1)-O(1)    | 92.1(3)    | F(5)-C(5)-F(4) | 107.8(9)  |
| O(4)-Ru(1)-O(1)      | 91.5(3)    | F(6)-C(5)-F(4) | 107.9(9)  |
| O(5)-Ru(1)-O(1)      | 92.8(3)    | F(5)-C(5)-C(6) | 104.8(10) |
| O(3)-Ru(1)-O(2)      | 92.1(2)    | F(6)-C(5)-C(6) | 112.9(9)  |
| O(3)#1-Ru(1)-O(2)    | 85.1(2)    | F(4)-C(5)-C(6) | 112.4(8)  |
| O(4)-Ru(1)-O(2)      | 92.7(2)    | O(4)-C(6)-C(7) | 110.6(8)  |
| O(5)-Ru(1)-O(2)      | 90.7(3)    | O(4)-C(6)-C(5) | 128.0(9)  |
| O(1)-Ru(1)-O(2)      | 174.7(2)   | C(7)-C(6)-C(5) | 110.8(8)  |
| O(3)-Ru(1)-Ru(1)#1   | 51.97(17)  | C(6)-C(7)-C(8) | 121.1(8)  |
| O(3)#1-Ru(1)-Ru(1)#1 | 51.69(16)  | O(5)-C(8)-C(7) | 123.3(9)  |
| O(4)-Ru(1)-Ru(1)#1   | 134.84(18) | O(5)-C(8)-C(9) | 127.5(9)  |
| O(5)-Ru(1)-Ru(1)#1   | 136.23(16) | C(7)-C(8)-C(9) | 111.9(8)  |
| O(1)-Ru(1)-Ru(1)#1   | 86.99(16)  | C(7)-C(8)-C(9) | 120.7(9)  |
| O(2)-Ru(1)-Ru(1)#1   | 87.72(15)  | F(1)-C(9)-F(3) | 106.7(9)  |
| C(1)#1-O(1)-Ru(1)    | 120.1(6)   | F(1)-C(9)-F(2) | 106.9(9)  |
| C(1)-O(2)-Ru(1)      | 118.9(6)   | F(3)-C(9)-F(2) | 106.2(9)  |
| C(3)-O(3)-Ru(1)      | 123.9(5)   | F(1)-C(9)-C(8) | 112.5(9)  |
| C(3)-O(3)-Ru(1)#1    | 122.3(5)   | F(3)-C(9)-C(8) | 111.3(8)  |
| Ru(1)-O(3)-Ru(1)#1   | 76.4(2)    | F(2)-C(9)-C(8) | 112.8(9)  |

Symmetry transformations used to generate equivalent atoms: #1 -x+1, -y+1, -z+1

**Table S2-4.** Selected bond distances (Å) and angles (°) for compound **4**

| Selected bond distances (Å) |           |             |           |
|-----------------------------|-----------|-------------|-----------|
| Ru(1)-Ru(2)                 | 2.4748(8) | O(6)-C(6)   | 1.270(10) |
| Ru(1)-O(1)                  | 1.973(5)  | O(7)-C(10)  | 1.279(10) |
| Ru(1)-O(2)                  | 2.009(5)  | O(8)-C(12)  | 1.274(10) |
| Ru(1)-O(8)                  | 2.023(6)  | O(9)-C(15)  | 1.320(10) |
| Ru(1)-O(7)                  | 2.023(6)  | O(10)-C(17) | 1.303(9)  |
| Ru(1)-O(3)                  | 2.070(5)  | C(3)-C(4)   | 1.508(12) |
| Ru(1)-O(5)                  | 2.084(5)  | C(4)-C(5)   | 1.502(15) |
| Ru(2)-O(1)                  | 1.996(5)  | C(6)-C(7)   | 1.491(13) |
| Ru(2)-O(2)                  | 2.011(5)  | C(7)-C(8)   | 1.488(15) |
| Ru(2)-O(4)                  | 2.085(5)  | C(9)-C(10)  | 1.499(14) |
| Ru(2)-O(6)                  | 2.079(6)  | C(10)-C(11) | 1.406(14) |
| Ru(2)-O(9)                  | 2.009(5)  | C(11)-C(12) | 1.394(14) |
| Ru(2)-O(10)                 | 2.034(5)  | C(12)-C(13) | 1.512(14) |
| O(1)-C(1)                   | 1.422(10) | C(14)-C(15) | 1.479(12) |
| O(2)-C(2)                   | 1.436(10) | C(15)-C(16) | 1.388(12) |
| O(3)-C(3)                   | 1.284(10) | C(16)-C(17) | 1.356(13) |
| O(4)-C(3)                   | 1.258(10) | C(17)-C(18) | 1.514(12) |
| O(5)-C(6)                   | 1.284(10) |             |           |

| Selected angles (°) |            |                   |           |
|---------------------|------------|-------------------|-----------|
| Ru(2)-Ru(1)-O(1)    | 51.84(15)  | O(6)-Ru(2)-O(9)   | 92.6(2)   |
| Ru(2)-Ru(1)-O(2)    | 52.05(15)  | O(6)-Ru(2)-O(10)  | 90.5(2)   |
| Ru(2)-Ru(1)-O(3)    | 87.56(15)  | O(9)-Ru(2)-O(10)  | 90.9(2)   |
| Ru(2)-Ru(1)-O(5)    | 86.99(15)  | Ru(1)-O(1)-Ru(2)  | 77.16(19) |
| Ru(2)-Ru(1)-O(7)    | 133.66(18) | Ru(1)-O(1)-C(1)   | 122.9(5)  |
| Ru(2)-Ru(1)-O(8)    | 135.35(17) | Ru(2)-O(1)-C(1)   | 122.5(5)  |
| O(1)-Ru(1)-O(2)     | 103.9(2)   | Ru(1)-O(2)-Ru(2)  | 75.99(18) |
| O(1)-Ru(1)-O(3)     | 93.6(2)    | Ru(1)-O(2)-C(2)   | 122.6(5)  |
| O(1)-Ru(1)-O(5)     | 83.9(2)    | Ru(2)-O(2)-C(2)   | 122.9(5)  |
| O(1)-Ru(1)-O(7)     | 82.2(2)    | Ru(1)-O(3)-C(3)   | 119.1(5)  |
| O(1)-Ru(1)-O(8)     | 171.1(2)   | Ru(2)-O(4)-C(3)   | 119.6(5)  |
| O(2)-Ru(1)-O(3)     | 83.6(2)    | Ru(1)-O(5)-C(6)   | 119.7(5)  |
| O(2)-Ru(1)-O(5)     | 92.1(2)    | Ru(2)-O(6)-C(6)   | 119.7(6)  |
| O(2)-Ru(1)-O(7)     | 171.8(2)   | Ru(1)-O(7)-C(10)  | 125.7(6)  |
| O(2)-Ru(1)-O(8)     | 83.5(2)    | Ru(1)-O(8)-C(12)  | 124.7(6)  |
| O(3)-Ru(1)-O(5)     | 174.4(2)   | Ru(2)-O(9)-C(15)  | 126.4(5)  |
| O(3)-Ru(1)-O(7)     | 90.6(2)    | Ru(2)-O(10)-(17)  | 125.0(5)  |
| O(3)-Ru(1)-O(8)     | 92.1(2)    | O(3)-C(3)-O(4)    | 126.7(8)  |
| O(5)-Ru(1)-O(7)     | 94.1(2)    | O(3)-C(3)-C(4)    | 115.8(7)  |
| O(5)-Ru(1)-O(8)     | 90.9(2)    | O(4)-C(3)-C(4)    | 117.5(7)  |
| O(7)-Ru(1)-O(8)     | 91.0(2)    | C(3)-C(4)-C(5)    | 110.7(8)  |
| Ru(1)-Ru(2)-O(1)    | 51.01(15)  | O(5)-C(6)-O(6)    | 126.0(8)  |
| Ru(1)-Ru(2)-O(2)    | 51.96(15)  | O(5)-C(6)-C(7)    | 116.0(8)  |
| Ru(1)-Ru(2)-O(4)    | 86.82(15)  | O(6)-C(6)-C(7)    | 118.0(8)  |
| Ru(1)-Ru(2)-O(6)    | 87.51(15)  | C(6)-C(7)-C(8)    | 113.4(8)  |
| Ru(1)-Ru(2)-O(9)    | 134.03(15) | O(7)-C(10)-C(9)   | 115.7(9)  |
| Ru(1)-Ru(2)-O(10)   | 135.04(16) | O(7)-C(10)-C(11)  | 125.1(9)  |
| O(1)-Ru(2)-O(2)     | 103.0(2)   | C(9)-C(10)-C(11)  | 119.1(8)  |
| O(1)-Ru(2)-O(4)     | 92.3(2)    | C(10)-C(11)-(12)  | 125.6(8)  |
| O(1)-Ru(2)-O(6)     | 84.5(2)    | O(8)-C(12)-C(11)  | 127.1(9)  |
| O(1)-Ru(2)-O(9)     | 83.2(2)    | O(8)-C(12)-(13)   | 114.4(8)  |
| O(1)-Ru(2)-O(10)    | 172.1(2)   | C(11)-C(12)-(13)  | 118.6(8)  |
| O(2)-Ru(2)-O(4)     | 83.9(2)    | O(9)-C(15)-C(14)  | 113.8(7)  |
| O(2)-Ru(2)-O(6)     | 92.2(2)    | O(9)-C(15)-C(16)  | 122.8(8)  |
| O(2)-Ru(2)-O(9)     | 172.5(2)   | C(14)-C(15)-C(16) | 123.4(8)  |
| O(2)-Ru(2)-O(10)    | 83.3(2)    | C(15)-C(16)-C(17) | 129.8(8)  |
| O(4)-Ru(2)-O(6)     | 174.3(2)   | O(10)-C(17)-C(16) | 124.9(8)  |
| O(4)-Ru(2)-O(9)     | 91.7(2)    | O(10)-C(17)-C(18) | 114.6(8)  |
| O(4)-Ru(2)-O(10)    | 93.3(2)    | C(16)-C(17)-C(18) | 120.5(7)  |

**Table S2-5.** Selected bond distances (Å) and angles (°) for compound **5**

| Selected bond distances (Å) |          |           |           |
|-----------------------------|----------|-----------|-----------|
| Ru(1)-Ru(1)#1               | 2.450(6) | O(5)-C(6) | 1.254(17) |

|              |           |           |           |
|--------------|-----------|-----------|-----------|
| Ru(1)-O(1)   | 1.978(9)  | F(1)-C(5) | 1.361(17) |
| Ru(1)-O(3)   | 2.081(10) | F(2)-C(5) | 1.293(17) |
| Ru(1)-O(4)   | 2.009(10) | F(3)-C(5) | 1.314(17) |
| Ru(1)-O(5)   | 2.024(10) | C(2)-C(3) | 1.50(2)   |
| Ru(1)-O(1)#1 | 1.978(10) | C(3)-C(4) | 1.50(2)   |
| Ru(1)-O(2)#1 | 2.067(9)  | C(5)-C(6) | 1.531(18) |
| O(1)-C(1)    | 1.429(15) | C(6)-C(7) | 1.39(2)   |
| O(2)-C(2)    | 1.251(16) | C(7)-C(8) | 1.384(19) |
| O(3)-C(2)    | 1.292(17) | C(8)-C(9) | 1.51(2)   |
| O(4)-C(8)    | 1.252(16) |           |           |

Selected angles (°)

|                      |          |                    |           |
|----------------------|----------|--------------------|-----------|
| O(1)-Ru(1)-O(1)#1    | 103.5(4) | Ru(1)-O(1)-Ru(1)#1 | 76.5(3)   |
| O(1)-Ru(1)-O(4)      | 83.1(4)  | C(2)-O(2)-Ru(1)#1  | 119.7(8)  |
| O(1)#1-Ru(1)-O(4)    | 172.2(4) | C(2)-O(3)-Ru(1)    | 118.3(8)  |
| O(1)-Ru(1)-O(5)      | 171.1(4) | C(8)-O(4)-Ru(1)    | 126.8(8)  |
| O(1)#1-Ru(1)-O(5)    | 83.8(4)  | C(6)-O(5)-Ru(1)    | 124.1(8)  |
| O(4)-Ru(1)-O(5)      | 90.1(4)  | O(2)-C(2)-O(3)     | 126.8(12) |
| O(1)-Ru(1)-O(2)#1    | 85.0(3)  | O(2)-C(2)-C(3)     | 117.2(12) |
| O(1)#1-Ru(1)-O(2)#1  | 92.2(3)  | O(3)-C(2)-C(3)     | 115.9(12) |
| O(4)-Ru(1)-O(2)#1    | 92.7(4)  | C(2)-C(3)-C(4)     | 115.5(12) |
| O(5)-Ru(1)-O(2)#1    | 89.7(3)  | F(2)-C(5)-F(3)     | 109.0(12) |
| O(1)-Ru(1)-O(3)      | 91.9(3)  | F(2)-C(5)-F(1)     | 107.0(11) |
| O(1)#1-Ru(1)-O(3)    | 85.0(4)  | F(3)-C(5)-F(1)     | 105.2(12) |
| O(4)-Ru(1)-O(3)      | 90.6(4)  | F(2)-C(5)-C(6)     | 112.3(11) |
| O(5)-Ru(1)-O(3)      | 93.9(4)  | F(3)-C(5)-C(6)     | 113.9(11) |
| O(2)#1-Ru(1)-O(3)    | 175.1(4) | F(1)-C(5)-C(6)     | 109.0(11) |
| O(1)-Ru(1)-Ru(1)#1   | 51.8(3)  | O(5)-C(6)-C(7)     | 128.5(12) |
| O(1)#1-Ru(1)-Ru(1)#1 | 51.7(3)  | O(5)-C(6)-C(5)     | 112.3(10) |
| O(4)-Ru(1)-Ru(1)#1   | 134.7(3) | C(7)-C(6)-C(5)     | 119.3(12) |
| O(5)-Ru(1)-Ru(1)#1   | 135.3(2) | C(8)-C(7)-C(6)     | 124.1(14) |
| O(2)#1-Ru(1)-Ru(1)#1 | 87.7(3)  | O(4)-C(8)-C(7)     | 125.6(12) |
| O(3)-Ru(1)-Ru(1)#1   | 87.5(3)  | O(4)-C(8)-C(9)     | 116.2(12) |
| C(1)-O(1)-Ru(1)      | 123.4(8) | C(7)-C(8)-C(9)     | 117.9(12) |
| C(1)-O(1)-Ru(1)#1    | 124.0(8) |                    |           |

Symmetry transformations used to generate equivalent atoms: #1 -x+1, -y+1, -z+1

**Table S2-6.** Selected bond distances (Å) and angles (°) for compound **6**

| Selected bond distances (Å) |           |            |           |
|-----------------------------|-----------|------------|-----------|
| Ru(1)-Ru(1)#1               | 2.4601(6) | C(2)-C(3)  | 1.517(11) |
| Ru(1)-O(3)                  | 1.985(4)  | C(4)-C(5)  | 1.492(10) |
| Ru(1)-O(5)                  | 2.029(4)  | C(6)-C(7)  | 1.391(10) |
| Ru(1)-O(4)                  | 2.030(4)  | C(6)-C(8)  | 1.396(10) |
| Ru(1)-O(1)                  | 2.070(4)  | C(7)-C(9)  | 1.527(9)  |
| Ru(1)-O(2)#1                | 2.074(4)  | C(8)-C(10) | 1.521(10) |



|                      |            |                 |           |
|----------------------|------------|-----------------|-----------|
| Ru(1)-O(3)#1         | 1.995(4)   | C(9)-F(3)       | 1.314(9)  |
| O(1)-C(1)            | 1.282(7)   | C(9)-F(2)       | 1.308(8)  |
| O(2)-C(1)            | 1.275(7)   | C(9)-F(1)       | 1.315(9)  |
| O(3)-C(4)            | 1.466(8)   | C(10)-F(6)      | 1.310(10) |
| O(4)-C(7)            | 1.252(7)   | C(10)-F(4)      | 1.247(9)  |
| O(5)-C(8)            | 1.256(8)   | C(10)-F(5)      | 1.254(11) |
| C(1)-C(2)            | 1.489(9)   |                 |           |
| Selected #Angles (°) |            |                 |           |
| O(3)-Ru(1)-O(3)#1    | 103.64(16) | C(7)-O(4)-Ru(1) | 126.3(4)  |
| O(3)#1-Ru(1)-O(5)    | 170.85(16) | C(8)-O(5)-Ru(1) | 126.3(4)  |
| O(3)-Ru(1)-O(5)      | 84.48(16)  | O(2)-C(1)-O(1)  | 125.5(5)  |
| O(3)#1-Ru(1)-O(4)    | 83.47(16)  | O(2)-C(1)-C(2)  | 117.8(5)  |
| O(3)-Ru(1)-O(4)      | 171.94(17) | O(1)-C(1)-C(2)  | 116.7(5)  |
| O(5)-Ru(1)-O(4)      | 88.74(16)  | C(1)-C(2)-C(3)  | 114.1(6)  |
| O(3)#1-Ru(1)-O(1)    | 85.36(17)  | C(5)-C(4)-O(3)  | 109.5(5)  |
| O(3)-Ru(1)-O(1)      | 91.94(17)  | C(7)-C(6)-C(8)  | 121.8(6)  |
| O(5)-Ru(1)-O(1)      | 90.22(17)  | O(4)-C(7)-C(6)  | 128.5(6)  |
| O(4)-Ru(1)-O(1)      | 92.44(16)  | O(4)-C(7)-C(9)  | 112.8(6)  |
| O(3)#1-Ru(1)-O(2)#1  | 92.12(17)  | C(6)-C(7)-C(9)  | 118.7(6)  |
| O(3)-Ru(1)-O(2)#1    | 84.16(17)  | O(5)-C(8)-C(6)  | 128.2(6)  |
| O(5)-Ru(1)-O(2)#1    | 92.91(17)  | O(5)-C(8)-C(10) | 113.4(6)  |
| O(4)-Ru(1)-O(2)#1    | 91.86(16)  | C(6)-C(8)-C(10) | 118.4(6)  |
| O(1)-Ru(1)-O(2)#1    | 174.74(15) | F(3)-C(9)-F(2)  | 106.7(6)  |
| O(3)#1-Ru(1)-Ru(1)#1 | 51.65(11)  | F(3)-C(9)-F(1)  | 106.7(6)  |
| O(3)-Ru(1)-Ru(1)#1   | 51.99(12)  | F(2)-C(9)-F(1)  | 106.7(7)  |
| O(5)-Ru(1)-Ru(1)#1   | 136.29(11) | F(3)-C(9)-C(7)  | 113.8(6)  |
| O(4)-Ru(1)-Ru(1)#1   | 134.98(12) | F(2)-C(9)-C(7)  | 112.0(6)  |
| O(1)-Ru(1)-Ru(1)#1   | 87.81(11)  | F(1)-C(9)-C(7)  | 110.6(6)  |
| O(2)#1-Ru(1)-Ru(1)#1 | 87.01(11)  | F(6)-C(10)-F(4) | 103.2(8)  |
| C(1)-O(1)-Ru(1)      | 119.4(4)   | F(6)-C(10)-F(5) | 102.3(7)  |
| C(1)-O(2)-Ru(1)#1    | 120.2(4)   | F(4)-C(10)-F(5) | 111.2(9)  |
| C(4)-O(3)-Ru(1)      | 123.0(4)   | F(6)-C(10)-C(8) | 110.5(7)  |
| C(4)-O(3)-Ru(1)#1    | 122.1(4)   | F(4)-C(10)-C(8) | 115.3(7)  |
| Ru(1)-O(3)-Ru(1)#1   | 76.36(15)  | F(5)-C(10)-C(8) | 110.5(7)  |

Symmetry transformations used to generate equivalent atoms: #1 -x, -y+1, -z

**Table S2-7.** Selected bond distances (Å) and angles (°) for compound **7**

| Selected bond distances (Å) |          |            |           |
|-----------------------------|----------|------------|-----------|
| Ru(1)-Ru(1)#1               | 2.495(5) | O(5)-C(5)  | 1.252(14) |
| Ru(1)-O(1)                  | 1.997(8) | C(2)-C(3)  | 1.53(2)   |
| Ru(1)-O(4)                  | 2.040(9) | C(3)-Cl(1) | 1.815(18) |
| Ru(1)-O(5)                  | 2.053(8) | C(4)-C(5)  | 1.534(19) |
| Ru(1)-O(2)                  | 2.082(9) | C(5)-C(6)  | 1.44(2)   |
| Ru(1)-O(1)#1                | 2.021(9) | C(6)-C(7)  | 1.406(18) |

|                      |           |                    |           |
|----------------------|-----------|--------------------|-----------|
| Ru(1)-O(3)#1         | 2.099(10) | C(7)-C(8)          | 1.51(2)   |
| O(1)-C(1)            | 1.474(18) | C(8)-F(3)          | 1.357(18) |
| O(2)-C(2)            | 1.307(15) | C(8)-F(1)          | 1.334(15) |
| O(3)-C(2)            | 1.264(15) | C(8)-F(2)          | 1.395(19) |
| O(4)-C(7)            | 1.292(13) |                    |           |
| Selected angles (°)  |           |                    |           |
| O(1)-Ru(1)-O(1)#1    | 103.3(3)  | Ru(1)-O(1)-Ru(1)#1 | 76.8(3)   |
| O(1)-Ru(1)-O(4)      | 83.7(3)   | C(2)-O(2)-Ru(1)    | 119.5(8)  |
| O(1)#1-Ru(1)-O(4)    | 171.6(3)  | C(2)-O(3)-Ru(1)#1  | 119.4(8)  |
| O(1)-Ru(1)-O(5)      | 170.8(3)  | C(7)-O(4)-Ru(1)    | 125.8(8)  |
| O(1)#1-Ru(1)-O(5)    | 84.2(3)   | C(5)-O(5)-Ru(1)    | 128.4(8)  |
| O(4)-Ru(1)-O(5)      | 89.4(3)   | O(3)-C(2)-O(2)     | 126.5(12) |
| O(1)-Ru(1)-O(2)      | 83.6(3)   | O(3)-C(2)-C(3)     | 114.9(12) |
| O(1)#1-Ru(1)-O(2)    | 92.8(3)   | O(2)-C(2)-C(3)     | 118.6(12) |
| O(4)-Ru(1)-O(2)      | 92.8(4)   | C(2)-C(3)-Cl(1)    | 110.7(11) |
| O(5)-Ru(1)-O(2)      | 90.8(3)   | O(5)-C(5)-C(6)     | 124.1(11) |
| O(1)-Ru(1)-O(3)#1    | 92.5(3)   | O(5)-C(5)-C(4)     | 115.6(12) |
| O(1)#1-Ru(1)-O(3)#1  | 84.3(3)   | C(6)-C(5)-C(4)     | 120.3(10) |
| O(4)-Ru(1)-O(3)#1    | 90.7(4)   | C(7)-C(6)-C(5)     | 125.0(10) |
| O(5)-Ru(1)-O(3)#1    | 93.6(3)   | O(4)-C(7)-C(6)     | 126.7(12) |
| O(2)-Ru(1)-O(3)#1    | 174.5(3)  | O(4)-C(7)-C(8)     | 114.5(10) |
| O(1)-Ru(1)-Ru(1)#1   | 52.1(2)   | C(6)-C(7)-C(8)     | 118.9(10) |
| O(1)#1-Ru(1)-Ru(1)#1 | 51.2(2)   | F(3)-C(8)-F(1)     | 108.1(12) |
| O(4)-Ru(1)-Ru(1)#1   | 135.5(2)  | F(3)-C(8)-F(2)     | 102.5(12) |
| O(5)-Ru(1)-Ru(1)#1   | 135.1(2)  | F(1)-C(8)-F(2)     | 106.3(12) |
| O(2)-Ru(1)-Ru(1)#1   | 87.1(2)   | F(3)-C(8)-C(7)     | 112.9(11) |
| O(3)#1-Ru(1)-Ru(1)#1 | 87.4(2)   | F(1)-C(8)-C(7)     | 117.1(12) |
| C(1)-O(1)-Ru(1)      | 122.7(7)  | F(2)-C(8)-C(7)     | 108.8(11) |
| C(1)-O(1)-Ru(1)#1    | 121.7(7)  |                    |           |

Symmetry transformations used to generate equivalent atoms: #1 -x+1, -y+1, -z+2

**Table S2-8.** Selected bond distances (Å) and angles (°) for compound **8**

| Selected bond distances (Å) |           |           |          |
|-----------------------------|-----------|-----------|----------|
| Ru(1)-Ru(1)#1               | 2.4617(5) | C(1)-C(2) | 1.494(7) |
| Ru(1)-O(1)                  | 1.988(3)  | C(3)-C(4) | 1.507(6) |
| Ru(1)-O(1)#1                | 1.986(3)  | C(5)-F(1) | 1.305(6) |
| Ru(1)-O(2)                  | 2.068(3)  | C(5)-F(3) | 1.311(5) |
| Ru(1)-O(4)                  | 2.021(3)  | C(5)-F(2) | 1.317(6) |
| Ru(1)-O(5)                  | 2.025(3)  | C(5)-C(6) | 1.530(6) |
| Ru(1)-O(3)#1                | 2.067(3)  | C(6)-C(7) | 1.387(6) |
| O(1)-C(1)                   | 1.465(5)  | C(7)-C(8) | 1.398(6) |
| O(2)-C(3)                   | 1.273(4)  | C(8)-C(9) | 1.526(6) |
| O(3)-C(3)                   | 1.271(4)  | C(9)-F(5) | 1.265(6) |
| O(4)-C(6)                   | 1.259(5)  | C(9)-F(4) | 1.270(5) |

| O(5)-C(8)            | 1.262(5)   | C(9)-F(6)       | 1.297(6) |
|----------------------|------------|-----------------|----------|
| Cl(1)-C(4)           | 1.750(5)   |                 |          |
| Selected angles (°)  |            |                 |          |
| O(1)#1-Ru(1)-O(1)    | 103.44(10) | C(6)-O(4)-Ru(1) | 126.7(3) |
| O(1)#1-Ru(1)-O(4)    | 83.44(10)  | C(8)-O(5)-Ru(1) | 126.2(3) |
| O(1)-Ru(1)-O(4)      | 172.16(11) | O(1)-C(1)-C(2)  | 109.2(3) |
| O(1)#1-Ru(1)-O(5)    | 171.09(10) | O(3)-C(3)-O(2)  | 126.9(3) |
| O(1)-Ru(1)-O(5)      | 84.62(10)  | O(3)-C(3)-C(4)  | 117.9(3) |
| O(4)-Ru(1)-O(5)      | 88.78(11)  | O(2)-C(3)-C(4)  | 115.1(3) |
| O(1)#1-Ru(1)-O(3)#1  | 92.18(10)  | C(3)-C(4)-Cl(1) | 112.4(3) |
| O(1)-Ru(1)-O(3)#1    | 84.22(10)  | F(1)-C(5)-F(3)  | 107.0(4) |
| O(4)-Ru(1)-O(3)#1    | 91.84(10)  | F(1)-C(5)-F(2)  | 106.4(4) |
| O(5)-Ru(1)-O(3)#1    | 92.41(10)  | F(3)-C(5)-F(2)  | 107.5(3) |
| O(1)#1-Ru(1)-O(2)    | 85.47(10)  | F(1)-C(5)-C(6)  | 112.1(3) |
| O(1)-Ru(1)-O(2)      | 91.76(10)  | F(3)-C(5)-C(6)  | 113.3(4) |
| O(4)-Ru(1)-O(2)      | 92.55(10)  | F(2)-C(5)-C(6)  | 110.1(4) |
| O(5)-Ru(1)-O(2)      | 90.56(10)  | O(4)-C(6)-C(7)  | 128.4(4) |
| O(3)#1-Ru(1)-O(2)    | 174.75(10) | O(4)-C(6)-C(5)  | 112.7(3) |
| O(1)#1-Ru(1)-Ru(1)#1 | 51.76(7)   | C(7)-C(6)-C(5)  | 118.9(3) |
| O(1)-Ru(1)-Ru(1)#1   | 51.69(7)   | C(6)-C(7)-C(8)  | 121.4(4) |
| O(4)-Ru(1)-Ru(1)#1   | 135.06(8)  | O(5)-C(8)-C(7)  | 128.5(4) |
| O(5)-Ru(1)-Ru(1)#1   | 136.16(8)  | O(5)-C(8)-C(9)  | 113.0(4) |
| O(3)#1-Ru(1)-Ru(1)#1 | 87.09(7)   | C(7)-C(8)-C(9)  | 118.5(3) |
| O(2)-Ru(1)-Ru(1)#1   | 87.77(7)   | F(5)-C(9)-F(4)  | 110.5(5) |
| C(1)-O(1)-Ru(1)#1    | 122.5(2)   | F(5)-C(9)-F(6)  | 104.0(5) |
| C(1)-O(1)-Ru(1)      | 122.7(2)   | F(4)-C(9)-F(6)  | 104.0(5) |
| Ru(1)#1-O(1)-Ru(1)   | 76.56(9)   | F(5)-C(9)-C(8)  | 112.5(4) |
| C(3)-O(2)-Ru(1)      | 118.6(2)   | F(4)-C(9)-C(8)  | 114.0(4) |
| C(3)-O(3)-Ru(1)#1    | 119.5(2)   | F(6)-C(9)-C(8)  | 110.9(4) |

Symmetry transformations used to generate equivalent atoms: #1 -x+1, -y+1, -z+1

**Table S2-9.** Selected bond distances (Å) and angles (°) for compound **9**

| Selected bond distances (Å) |            |             |           |
|-----------------------------|------------|-------------|-----------|
| Ru(1)-Ru(1)#1               | 2.4650(10) | C(3)-C(8)   | 1.364(11) |
| Ru(2)-Ru(3)                 | 2.4668(10) | C(3)-C(4)   | 1.382(9)  |
| Ru(1)-O(1)                  | 1.992(4)   | C(4)-C(5)   | 1.390(12) |
| Ru(1)-O(1)#1                | 1.991(4)   | C(5)-C(6)   | 1.348(13) |
| Ru(1)-O(5)                  | 2.019(4)   | C(6)-C(7)   | 1.364(19) |
| Ru(1)-O(4)                  | 2.030(4)   | C(7)-C(8)   | 1.375(17) |
| Ru(1)-O(2)                  | 2.065(4)   | C(9)-C(10)  | 1.548(13) |
| Ru(1)-O(3)#1                | 2.079(4)   | C(10)-C(11) | 1.389(11) |
| Ru(2)-O(6)                  | 1.988(4)   | C(11)-C(12) | 1.357(13) |
| Ru(3)-O(6)                  | 2.000(4)   | C(12)-C(13) | 1.504(12) |
| Ru(2)-O(12)                 | 2.026(4)   | C(13)-F(1)  | 1.20(12)  |

|             |           |             |           |
|-------------|-----------|-------------|-----------|
| Ru(2)-O(13) | 2.026(4)  | C(13)-F(2)  | 1.30(12)  |
| Ru(3)-O(9)  | 2.069(5)  | C(13)-F(3)  | 1.338(18) |
| Ru(2)-O(8)  | 2.068(5)  | C(17)-C(18) | 1.381(12) |
| O(1)-C(1)   | 1.443(8)  | C(17)-C(22) | 1.394(11) |
| O(2)-C(2)   | 1.274(7)  | C(18)-C(19) | 1.377(17) |
| O(3)-C(2)   | 1.273(7)  | C(19)-C(20) | 1.36(2)   |
| O(4)-C(12)  | 1.253(9)  | C(20)-C(21) | 1.35(2)   |
| O(5)-C(10)  | 1.262(8)  | C(21)-C(22) | 1.407(14) |
| C(2)-C(3)   | 1.491(9)  | C(30)-C(31) | 1.534(11) |
| O6-C14      | 1.432(7)  | C(31)-C(32) | 1.383(10) |
| O8-C16      | 1.287(9)  | C(32)-C(33) | 1.375(10) |
| O9-C16      | 1.276(9)  | C(33)-C(34) | 1.491(12) |
| O12-C31     | 1.248(7)  | F(4)-C(34)  | 1.319(13) |
| O13-C33     | 1.276(8)  | F(5)-C(34)  | 1.320(16) |
| C16-C17     | 1.481(10) | F6-C(34)    | 1.240(19) |

Selected angles (°)

|                      |            |                   |           |
|----------------------|------------|-------------------|-----------|
| O(1)-Ru(1)-O(1)#1    | 103.53(17) | C(12)-O(4)-Ru(1)  | 123.9(5)  |
| O(1)-Ru(1)-O(5)      | 171.30(17) | C(10)-O(5)-Ru(1)  | 125.8(4)  |
| O(1)#1-Ru(1)-O(5)    | 83.59(17)  | O(2)-C(2)-O(3)    | 126.7(6)  |
| O(1)-Ru(1)-O(4)      | 83.76(18)  | O(2)-C(2)-C(3)    | 116.8(5)  |
| O(1)#1-Ru(1)-O(4)    | 171.97(18) | O(3)-C(2)-C(3)    | 116.5(5)  |
| O(5)-Ru(1)-O(4)      | 89.45(18)  | C(8)-C(3)-C(4)    | 118.3(7)  |
| O(1)-Ru(1)-O(2)      | 83.89(17)  | C(8)-C(3)-C(2)    | 120.3(6)  |
| O(1)#1-Ru(1)-O(2)    | 93.43(17)  | C(4)-C(3)-C(2)    | 121.4(6)  |
| O(5)-Ru(1)-O(2)      | 90.77(17)  | C(3)-C(4)-C(5)    | 121.3(7)  |
| O(4)-Ru(1)-O(2)      | 90.67(18)  | C(6)-C(5)-C(4)    | 119.3(9)  |
| O(1)-Ru(1)-O(3)#1    | 92.96(17)  | C(5)-C(6)-C(7)    | 119.7(10) |
| O(1)#1-Ru(1)-O(3)#1  | 83.20(17)  | C(8)-C(7)-C(6)    | 121.5(11) |
| O(5)-Ru(1)-O(3)#1    | 92.84(17)  | C(3)-C(8)-C(7)    | 119.9(10) |
| O(4)-Ru(1)-O(3)#1    | 93.18(18)  | O(5)-C(10)-C(11)  | 126.2(7)  |
| O(2)-Ru(1)-O(3)#1    | 174.75(16) | O(5)-C(10)-C(9)   | 112.9(7)  |
| O(1)-Ru(1)-Ru(1)#1   | 51.76(12)  | C(11)-C(10)-C(9)  | 120.9(8)  |
| O(1)#1-Ru(1)-Ru(1)#1 | 51.77(12)  | C(12)-C(11)-C(10) | 124.2(8)  |
| O(5)-Ru(1)-Ru(1)#1   | 135.11(12) | O(4)-C(12)-C(11)  | 129.1(7)  |
| O(4)-Ru(1)-Ru(1)#1   | 135.41(14) | O(4)-C(12)-C(13)  | 112.3(9)  |
| O(2)-Ru(1)-Ru(1)#1   | 87.85(12)  | C(11)-C(12)-C(13) | 118.7(9)  |
| O(3)#1-Ru(1)-Ru(1)#1 | 86.91(12)  | F(1)-C(13)-F(2)   | 111.7(12) |
| C(1)-O(1)-Ru(1)      | 120.6(4)   | F(1)-C(13)-F(3)   | 103.7(13) |
| C(1)-O(1)-Ru(1)#1    | 122.3(4)   | F(2)-C(13)-F(3)   | 100.2(12) |
| Ru(1)-O(1)-Ru(1)#1   | 76.47(15)  | F(1)-C(13)-C(12)  | 115.7(12) |
| C(2)-O(2)-Ru(1)      | 119.1(4)   | F(2)-C(13)-C(12)  | 114.0(12) |
| C(2)-O(3)-Ru(1)#1    | 119.4(4)   | F(3)-C(13)-C(12)  | 109.8(9)  |
| O(6)-Ru(2)-O(7)      | 103.65(15) | C(31)-O(12)-Ru(2) | 126.6(4)  |
| O(6)-Ru(2)-O(12)     | 83.77(16)  | C(33)-O(13)-Ru(2) | 123.3(4)  |

|                   |            |                   |           |
|-------------------|------------|-------------------|-----------|
| O(7)-Ru(2)-O(12)  | 170.86(16) | O(9)-C(16)-O(8)   | 125.0(5)  |
| O(6)-Ru(2)-O(13)  | 170.34(16) | O(9)-C(16)-C(17)  | 118.2(5)  |
| O(7)-Ru(2)-O(13)  | 83.96(17)  | O(8)-C(16)-C(17)  | 116.8(6)  |
| O(12)-Ru(2)-O(13) | 89.26(17)  | C(18)-C(17)-C(22) | 119.4(7)  |
| O(6)-Ru(2)-O(8)   | 83.74(16)  | C(18)-C(17)-C(16) | 122.2(7)  |
| O(7)-Ru(2)-O(8)   | 93.44(17)  | C(22)-C(17)-C(16) | 118.3(7)  |
| O(12)-Ru(2)-O(8)  | 92.67(16)  | C(19)-C(18)-C(17) | 119.4(9)  |
| O(13)-Ru(2)-O(8)  | 89.93(17)  | C(20)-C(19)-C(18) | 121.5(10) |
| O(6)-Ru(2)-O(10)  | 91.89(15)  | C(21)-C(20)-C(19) | 120.4(9)  |
| O(7)-Ru(2)-O(10)  | 83.89(16)  | C(20)-C(21)-C(22) | 119.7(10) |
| O(12)-Ru(2)-O(10) | 90.61(15)  | C(17)-C(22)-C(21) | 119.7(9)  |
| O(13)-Ru(2)-O(10) | 94.88(16)  | O(13)-C(33)-C(32) | 128.4(6)  |
| O(8)-Ru(2)-O(10)  | 174.22(15) | O(13)-C(33)-C(34) | 111.4(7)  |
| O(6)-Ru(2)-Ru(3)  | 52.01(11)  | C(33)-C(32)-C(31) | 123.7(6)  |
| O(7)-Ru(2)-Ru(3)  | 51.64(11)  | C(32)-C(33)-C(34) | 120.1(7)  |
| O(12)-Ru(2)-Ru(3) | 135.52(12) | O(12)-C(31)-C(32) | 126.3(6)  |
| O(13)-Ru(2)-Ru(3) | 135.21(12) | O(12)-C(31)-C(30) | 114.3(6)  |
| O(8)-Ru(2)-Ru(3)  | 87.51(11)  | C(32)-C(31)-C(30) | 119.4(6)  |
| O(9)-Ru(3)-Ru(2)  | 87.08(11)  | F(6)-C(34)-F(5)   | 103.8(12) |
| C(14)-O(6)-Ru(2)  | 122.9(3)   | F(6)-C(34)-F(4)   | 110.0(9)  |
| C(14)-O(6)-Ru(3)  | 121.7(4)   | F(5)-C(34)-F(4)   | 98.4(9)   |
| Ru(2)-O(6)-Ru(3)  | 76.44(13)  | F(6)-C(34)-C(33)  | 116.5(8)  |
| C(16)-O(8)-Ru(2)  | 119.5(4)   | F(5)-C(34)-C(33)  | 111.1(8)  |
| C(16)-O(9)-Ru(3)  | 120.3(4)   | F(4)-C(34)-C(33)  | 115.0(9)  |

Symmetry transformations used to generate equivalent atoms: #1 -x+2, -y, -z

**Table S2-10.** Selected bond distances (Å) and angles (°) for compound **10**

| Selected bond distances (Å) |           |                      |           |
|-----------------------------|-----------|----------------------|-----------|
| Ru(1)-Ru(1)#1               | 2.4771(4) | O(2)-C(2)            | 1.261(4)  |
| Ru(1)-O(1)                  | 2.003(2)  | O(3)-C(2)            | 1.264(5)  |
| Ru(1)-O(1)#1                | 1.999(2)  | O(4)-C(4)            | 1.280(4)  |
| Ru(1)-O(2)                  | 2.086(2)  | O(5)-C(6)            | 1.282(4)  |
| Ru(1)-O(4)                  | 2.022(3)  | C(3)-C(4)            | 1.496(4)  |
| Ru(1)-O(5)                  | 2.013(2)  | C(4)-C(5)            | 1.399(4)  |
| Ru(1)-O(3)#1                | 2.077(2)  | C(5)-C(6)            | 1.386(4)  |
| O(1)-C(1)                   | 1.429(4)  | C(6)-C(7)            | 1.494(4)  |
| Selected angles (°)         |           |                      |           |
| O(1)#1-Ru(1)-O(1)           | 103.51(9) | O(4)-Ru(1)-Ru(1)#1   | 135.60(8) |
| O(1)#1-Ru(1)-O(5)           | 82.71(9)  | O(3)#1-Ru(1)-Ru(1)#1 | 87.49(6)  |
| O(1)-Ru(1)-O(5)             | 172.43(9) | O(2)-Ru(1)-Ru(1)#1   | 86.87(6)  |
| O(1)#1-Ru(1)-O(4)           | 171.38(9) | C(1)-O(1)-Ru(1)#1    | 121.8(2)  |
| O(1)-Ru(1)-O(4)             | 84.08(10) | C(1)-O(1)-Ru(1)      | 122.9(2)  |
| O(5)-Ru(1)-O(4)             | 90.06(10) | Ru(1)#1-O(1)-Ru(1)   | 76.49(8)  |
| O(1)#1-Ru(1)-O(3)#1         | 83.49(9)  | C(2)-O(2)-Ru(1)      | 118.6(2)  |

|                      |           |                   |            |
|----------------------|-----------|-------------------|------------|
| O(1)-Ru(1)-O(3)#1    | 93.38(9)  | C(2)-O(3)-Ru(1)#1 | 118.4(2)   |
| O(5)-Ru(1)-O(3)#1    | 91.60(9)  | C(4)-O(4)-Ru(1)   | 125.83(19) |
| O(4)-Ru(1)-O(3)#1    | 92.07(9)  | C(6)-O(5)-Ru(1)   | 125.57(18) |
| O(1)#1-Ru(1)-O(2)    | 92.87(9)  | O(2)-C(2)-O(3)    | 128.3(3)   |
| O(1)-Ru(1)-O(2)      | 83.25(9)  | O(4)-C(4)-C(5)    | 125.0(3)   |
| O(5)-Ru(1)-O(2)      | 92.22(9)  | O(4)-C(4)-C(3)    | 115.3(3)   |
| O(4)-Ru(1)-O(2)      | 92.07(9)  | C(5)-C(4)-C(3)    | 119.7(3)   |
| O(3)#1-Ru(1)-O(2)    | 174.36(9) | C(6)-C(5)-C(4)    | 126.1(3)   |
| O(1)#1-Ru(1)-Ru(1)#1 | 51.83(6)  | O(5)-C(6)-C(5)    | 125.5(3)   |
| O(1)-Ru(1)-Ru(1)#1   | 51.69(6)  | O(5)-C(6)-C(7)    | 114.4(2)   |
| O(5)-Ru(1)-Ru(1)#1   | 134.35(6) | C(5)-C(6)-C(7)    | 120.1(3)   |

Symmetry transformations used to generate equivalent atoms: #1 -x, -y+1, -z+1

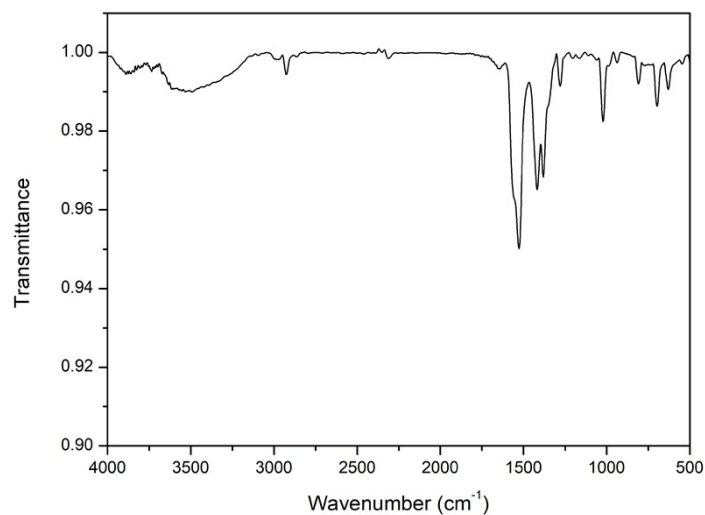

**Fig. S1-1** IR spectra of compound 1.

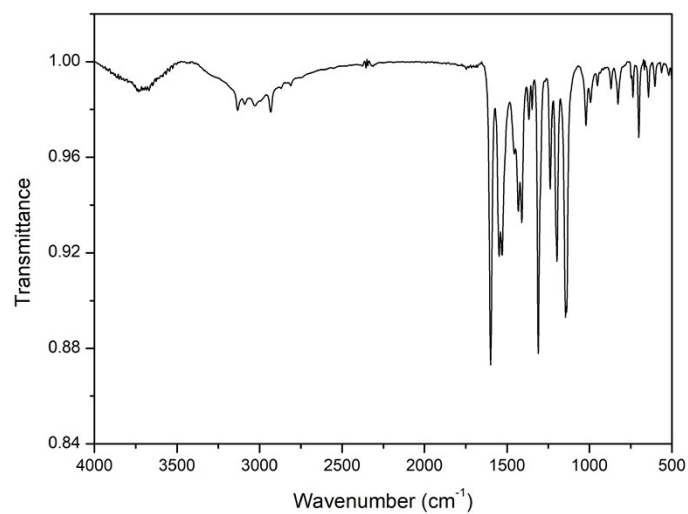

**Fig S1-2.** IR spectra of compound 2.

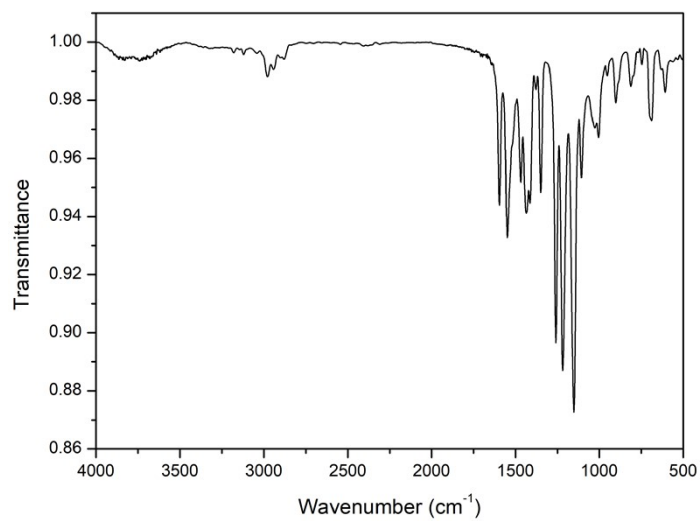

**Fig S1-3.** IR spectra of compound 3.

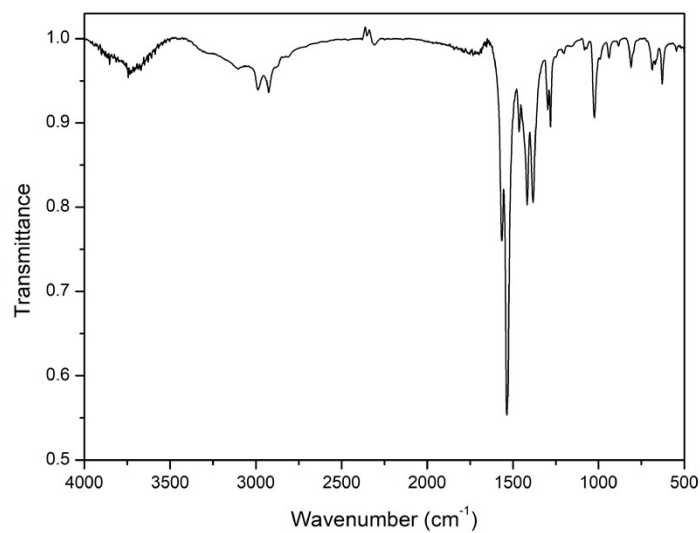

**Fig S1-4.** IR spectra of compound 4.

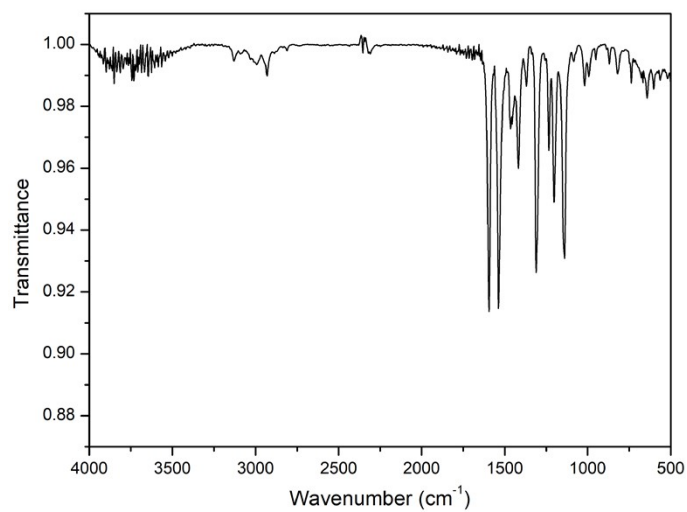

**Fig S1-5.** IR spectra of compound 5.

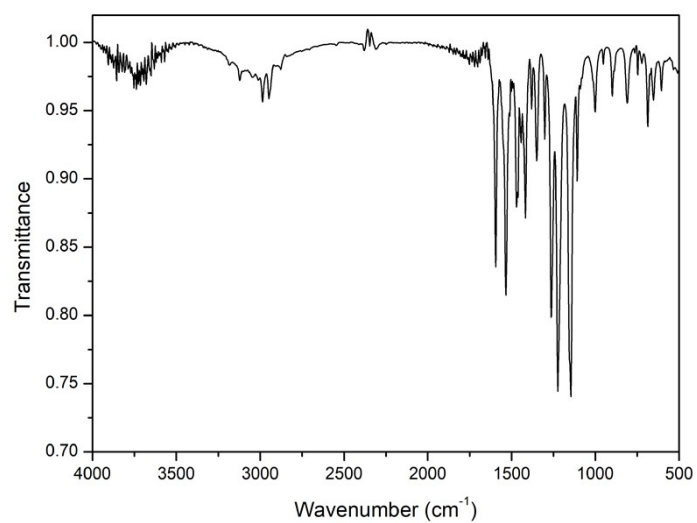

**Fig S1-6.** IR spectra of compound **6**.

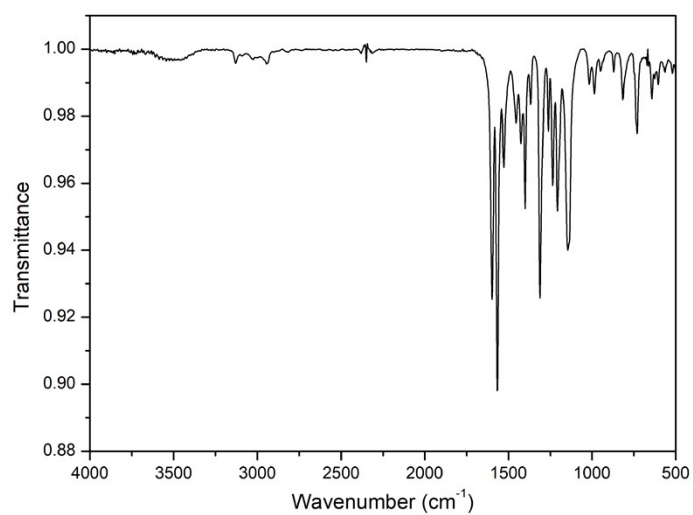

**Fig S1-7.** IR spectra of compound **7**.

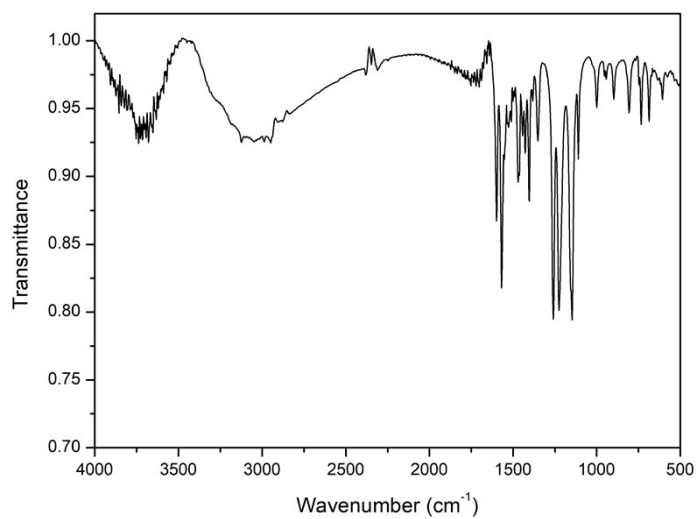

**Fig S1-8.** IR spectra of compound **8**.



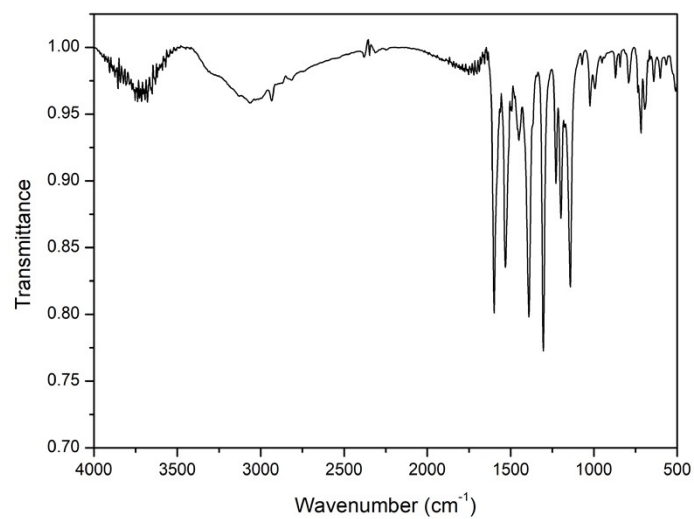

**Fig S1-9.** IR spectra of compound **9**.

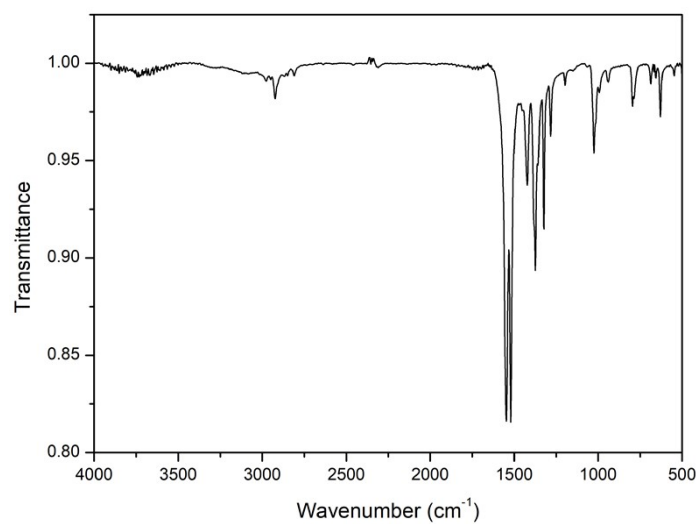

**Fig S1-10.** IR spectra of compound **10**.

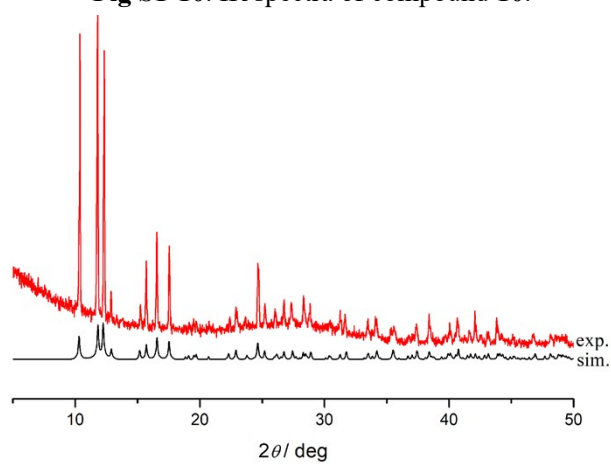

**Fig. S2-1** Comparison of XRPD patterns of the simulated pattern from the single-crystal structure determination and as-synthesized product of **1**.

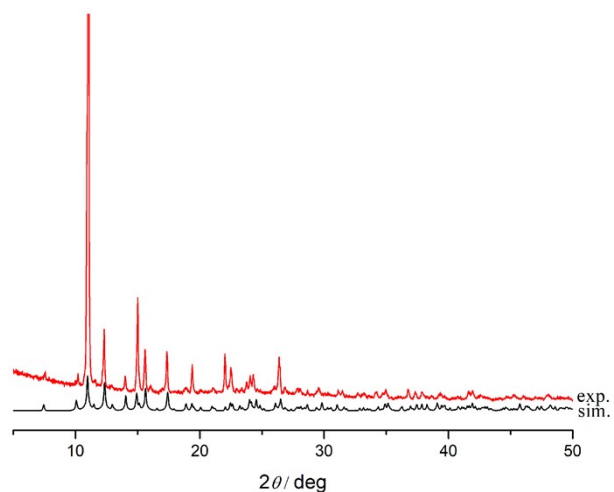

**Fig. S2-2** Comparison of XRPD patterns of the simulated pattern from the single-crystal structure determination and as-synthesized product of **2**.

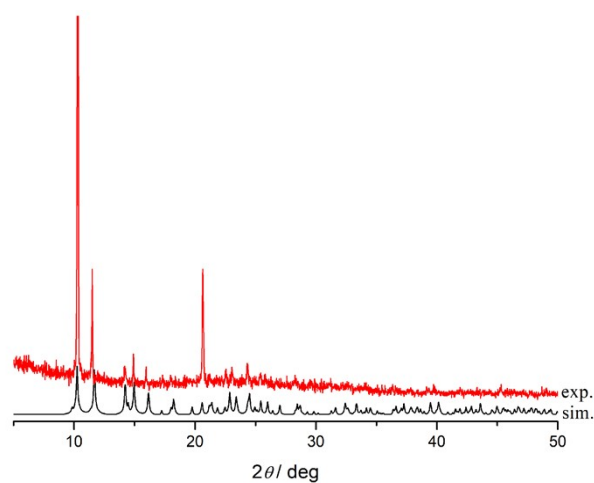

**Fig. S2-3** Comparison of XRPD patterns of the simulated pattern from the single-crystal structure determination and as-synthesized product of **3**

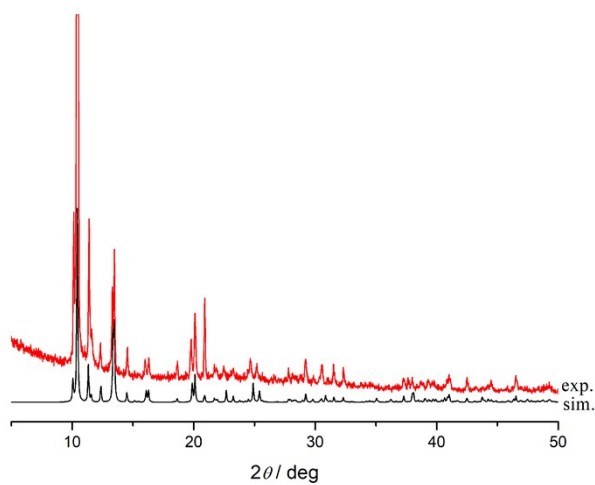

**Fig. S2-4** Comparison of XRPD patterns of the simulated pattern from the single-crystal structure determination and as-synthesized product of **4**.

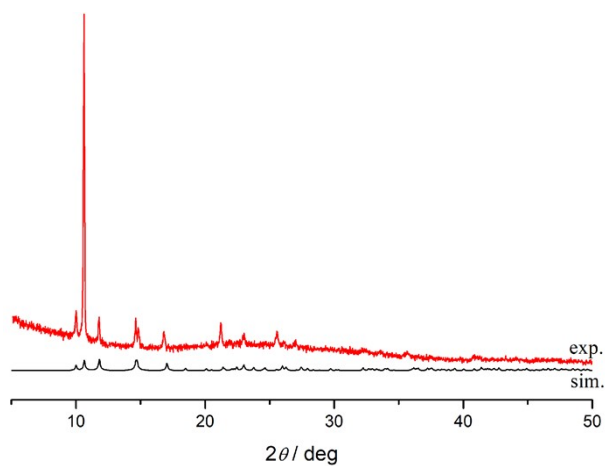

**Fig. S2-5** Comparison of XRPD patterns of the simulated pattern from the single-crystal structure determination and as-synthesized product of **5**.

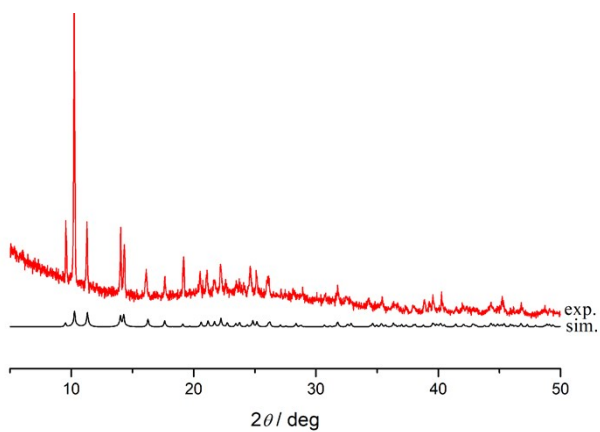

**Fig. S2-6** Comparison of XRPD patterns of the simulated pattern from the single-crystal structure determination and as-synthesized product of **6**.

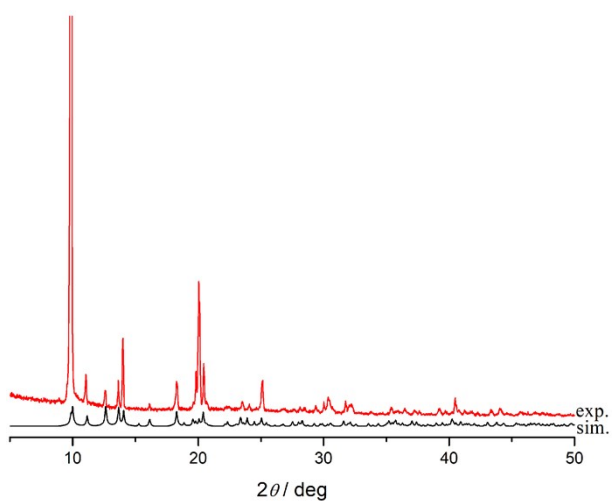

**Fig. S2-7** Comparison of XRPD patterns of the simulated pattern from the single-crystal structure determination and as-synthesized product of **7**.

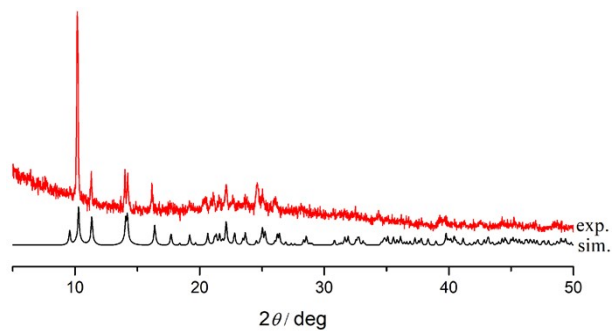

**Fig. S2-8** Comparison of XRPD patterns of the simulated pattern from the single-crystal structure determination and as-synthesized product of **8**.

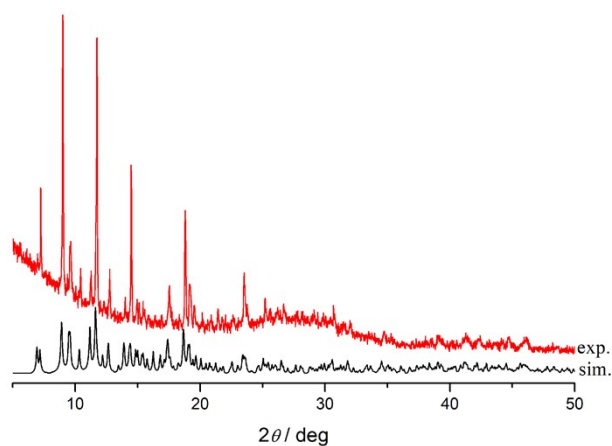

**Fig. S2-9** Comparison of XRPD patterns of the simulated pattern from the single-crystal structure determination and as-synthesized product of **9**.

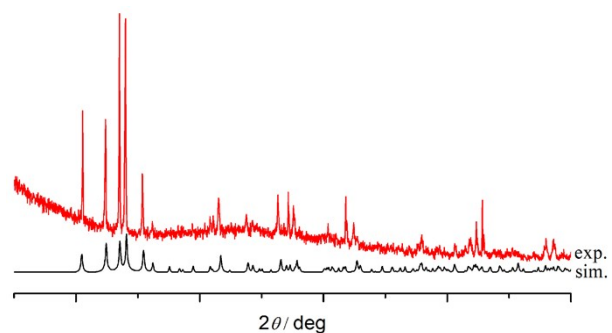

**Fig. S2-10** Comparison of XRPD patterns of the simulated pattern from the single-crystal structure determination and as-synthesized product of **10**.

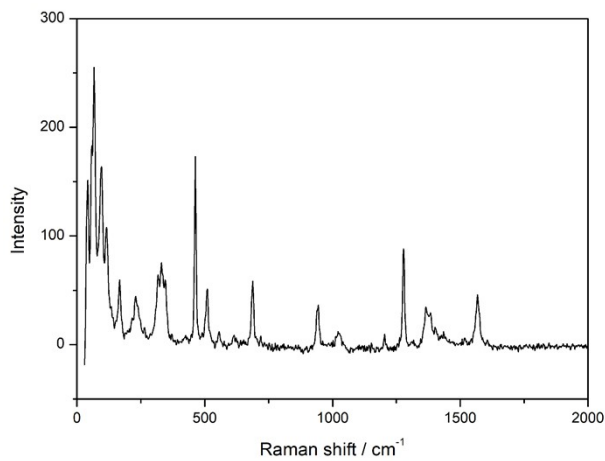

**Fig. S3-1** Raman spectrum of compound 1.

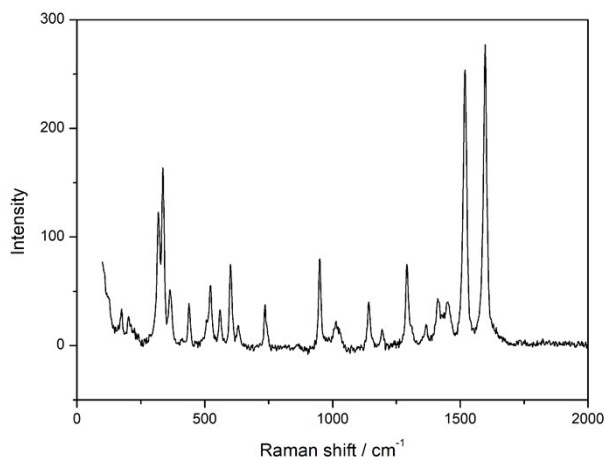

**Fig. S3-2** Raman spectrum of compound 2.

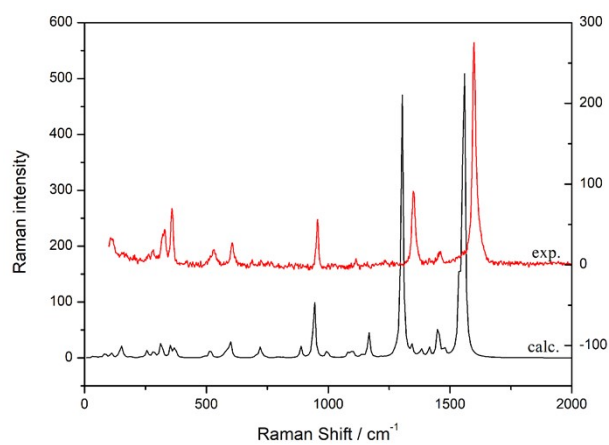

**Fig. S3-3** Raman spectrum of compound 3

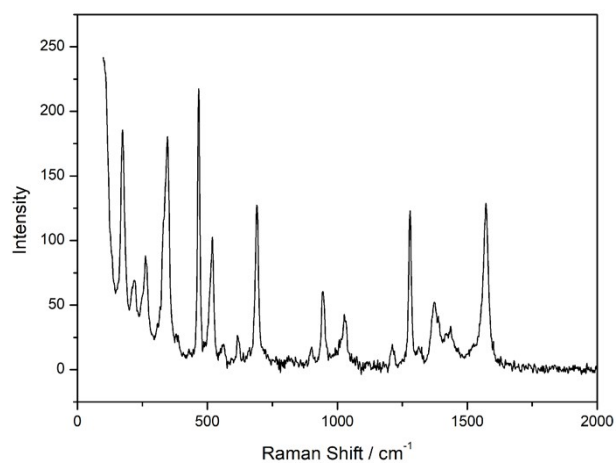

**Fig. S3-4** Raman spectrum of compound **4**

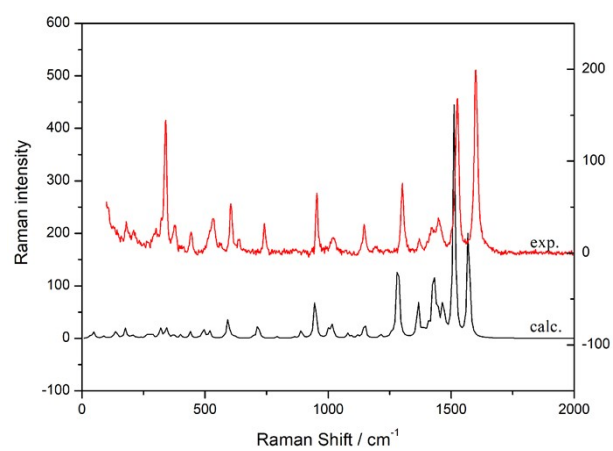

**Fig. S3-5** Raman spectrum of compound **5**

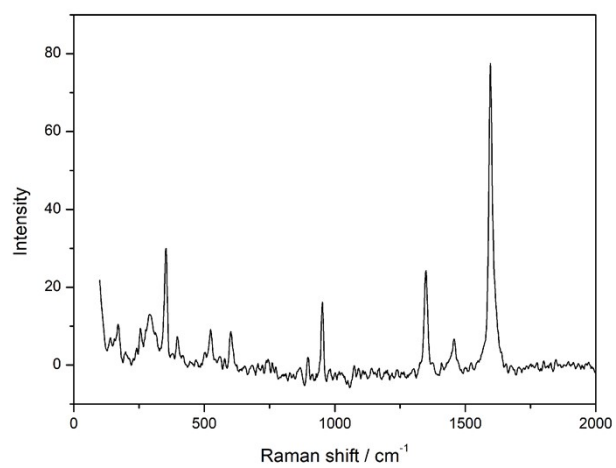

**Fig. S3-6** Raman spectrum of compound **6**

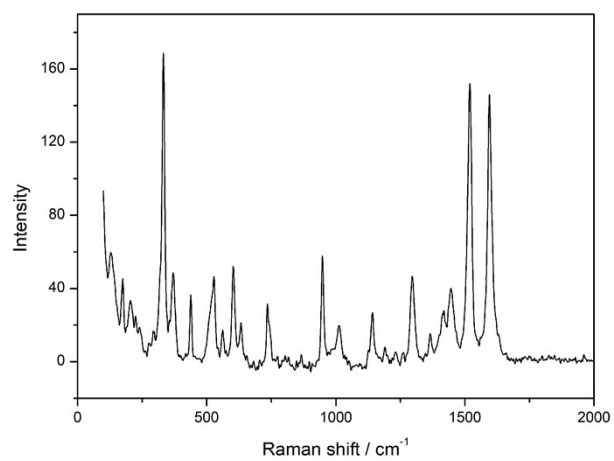

**Fig. S3-7** Raman spectrum of compound **7**

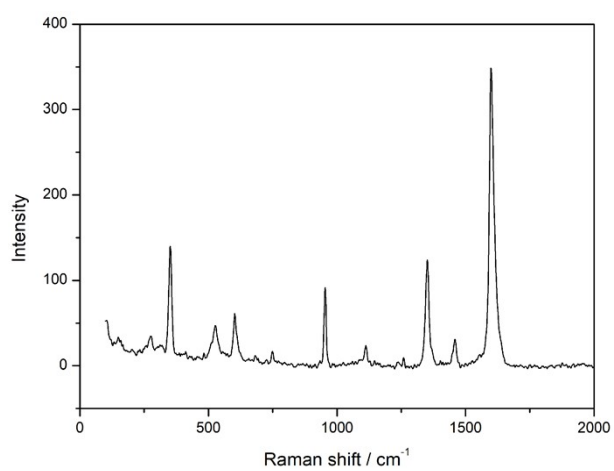

**Fig. S3-8** Raman spectrum of compound **8**

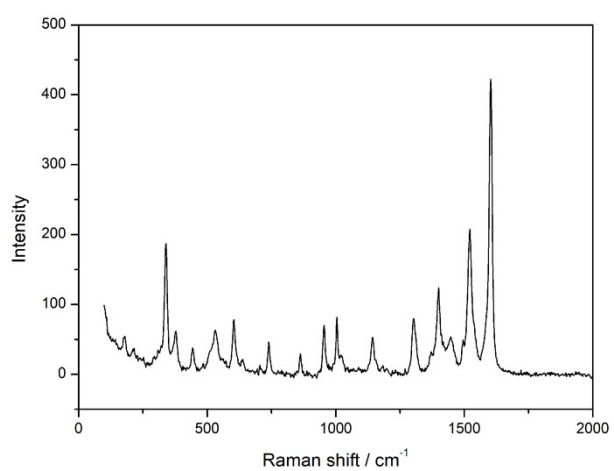

**Fig. S3-9** Raman spectrum of compound **9**

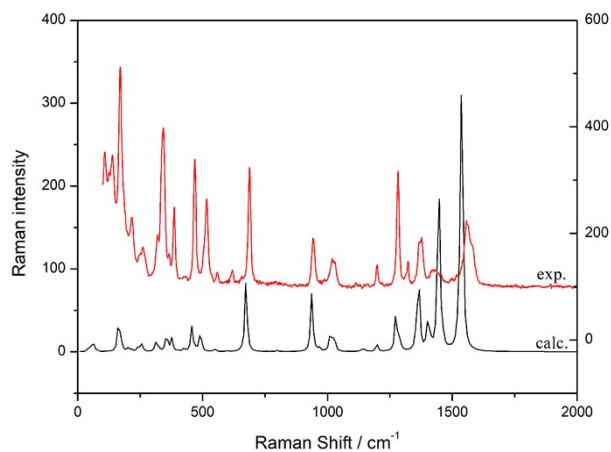

**Fig. S3-10** Raman spectrum of compound **10**

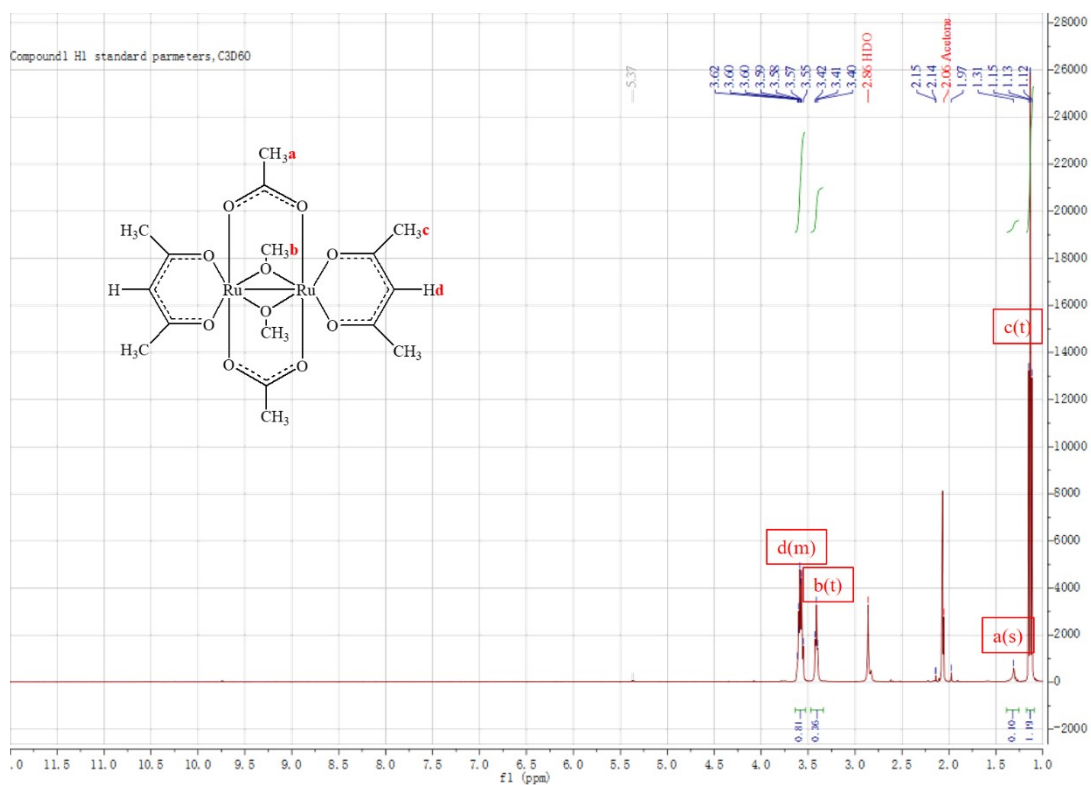

**Fig. S4-1** <sup>1</sup>H NMR of **1** in CDCl<sub>3</sub> at 293 K.



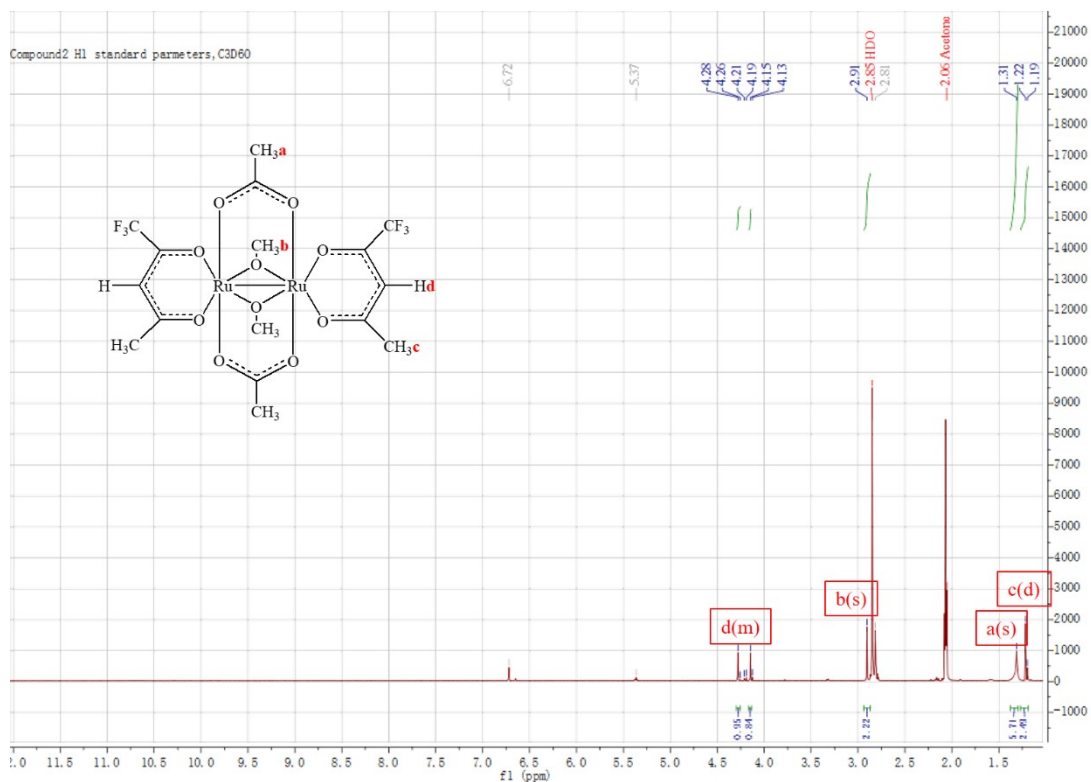

Fig. S4-2 <sup>1</sup>H NMR of 2 in CDCl<sub>3</sub> at 293 K.

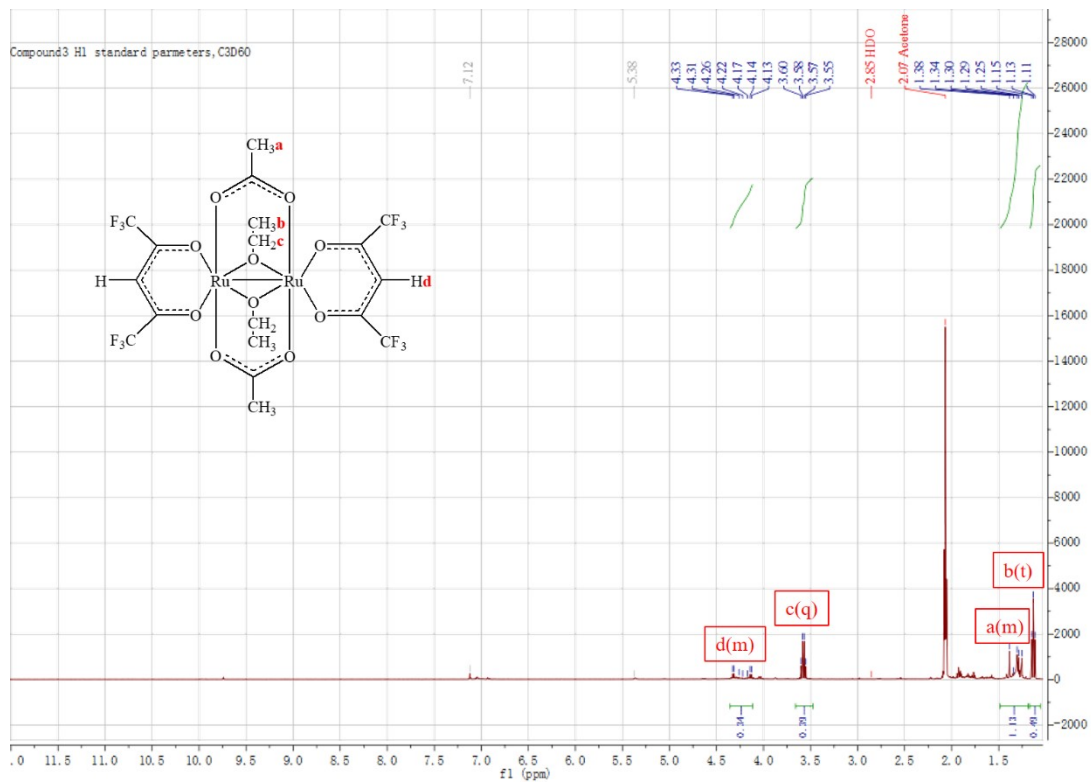

Fig. S4-3 <sup>1</sup>H NMR of 3 in CDCl<sub>3</sub> at 293 K.

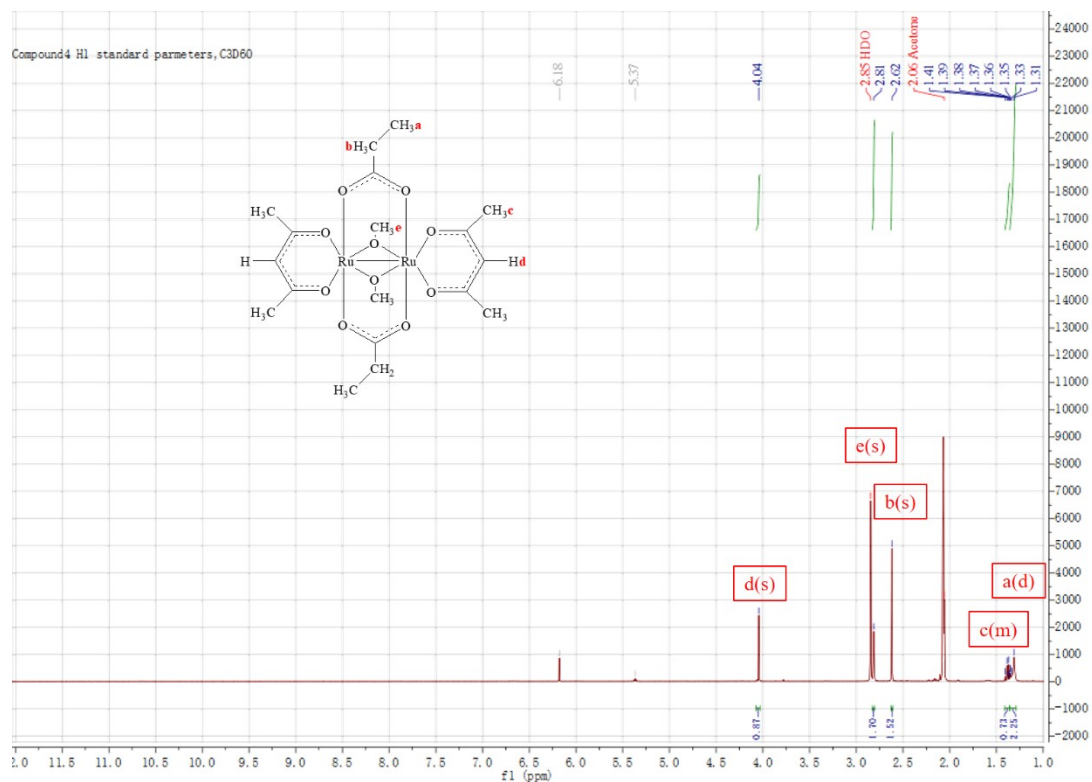

Fig. S4-4 <sup>1</sup>H NMR of 4 in CDCl<sub>3</sub> at 293 K.

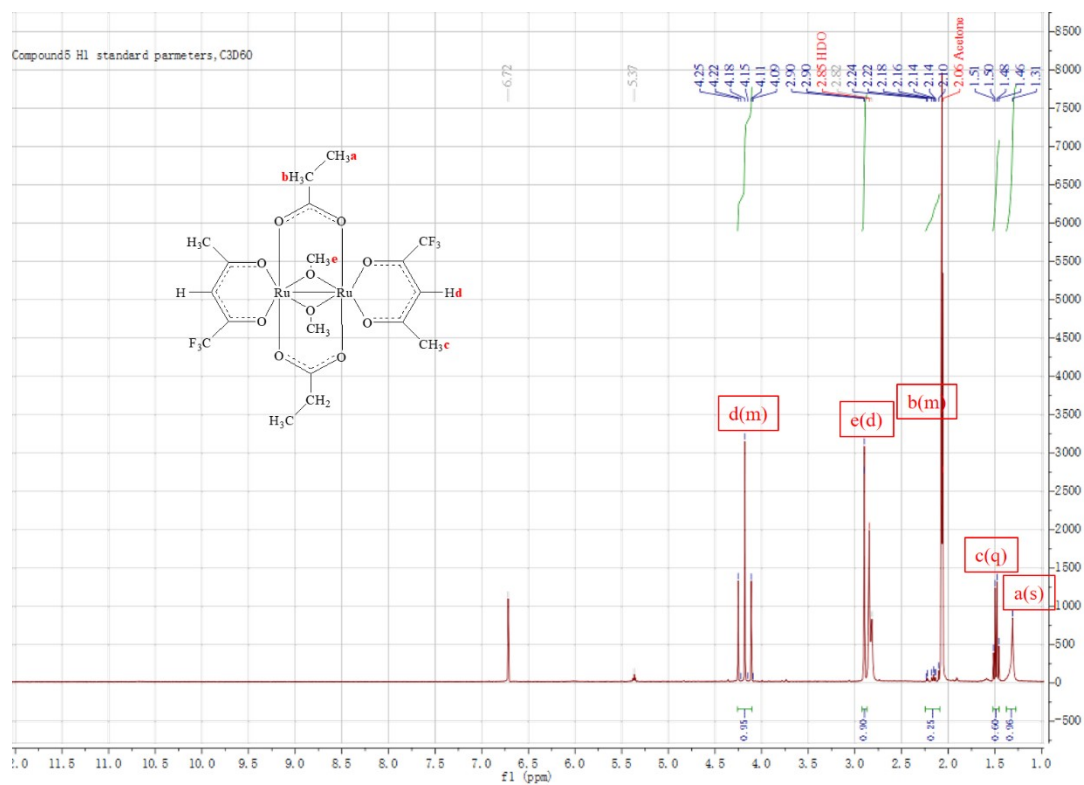

Fig. S4-5 <sup>1</sup>H NMR of 5 in CDCl<sub>3</sub> at 293 K.

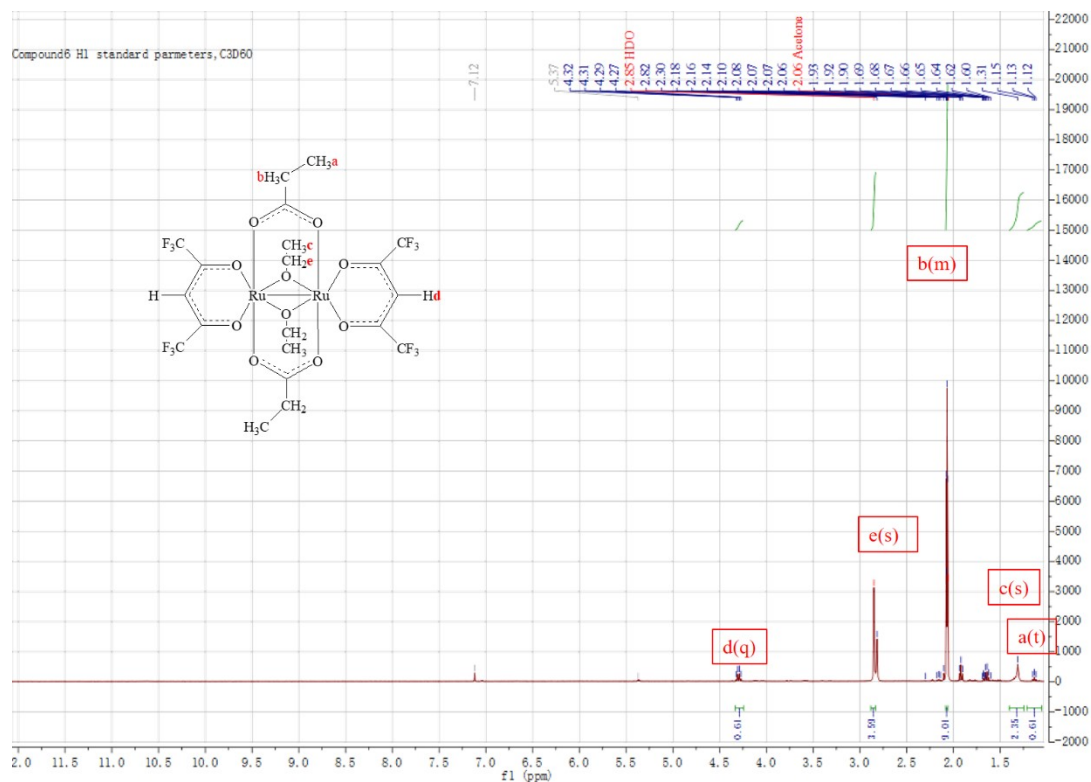

Fig. S4-6  $^1\text{H}$  NMR of 6 in  $\text{CDCl}_3$  at 293 K.

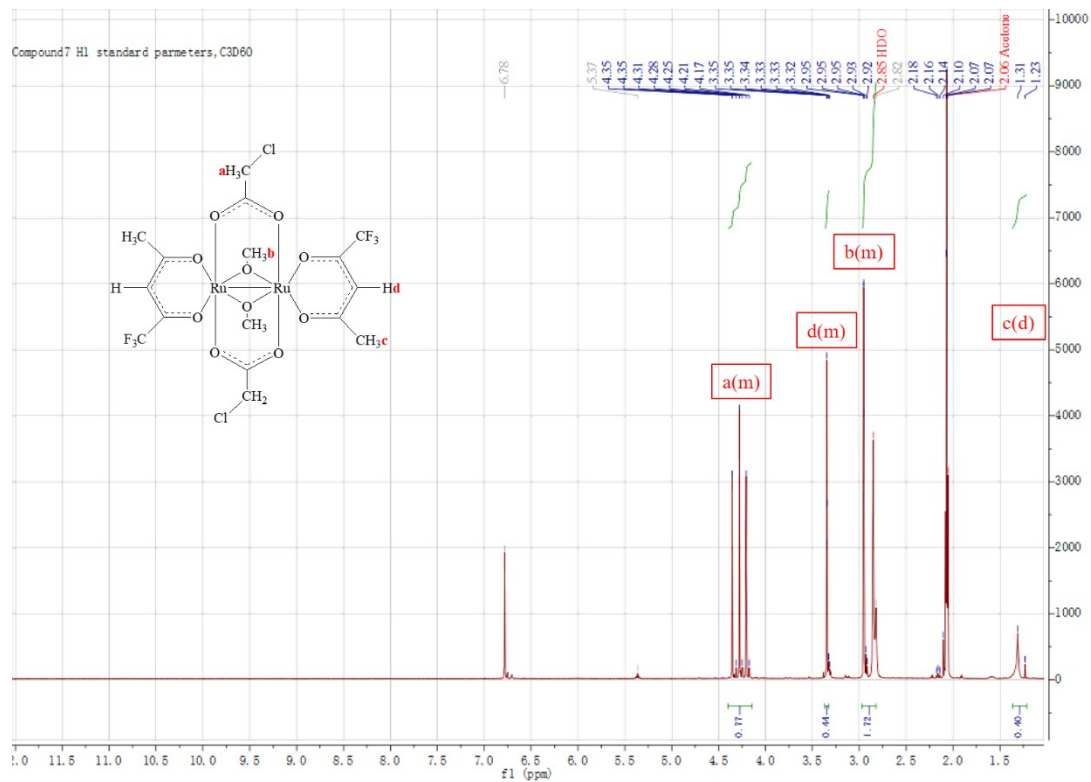

Fig. S4-7  $^1\text{H}$  NMR of 7 in  $\text{CDCl}_3$  at 293 K.

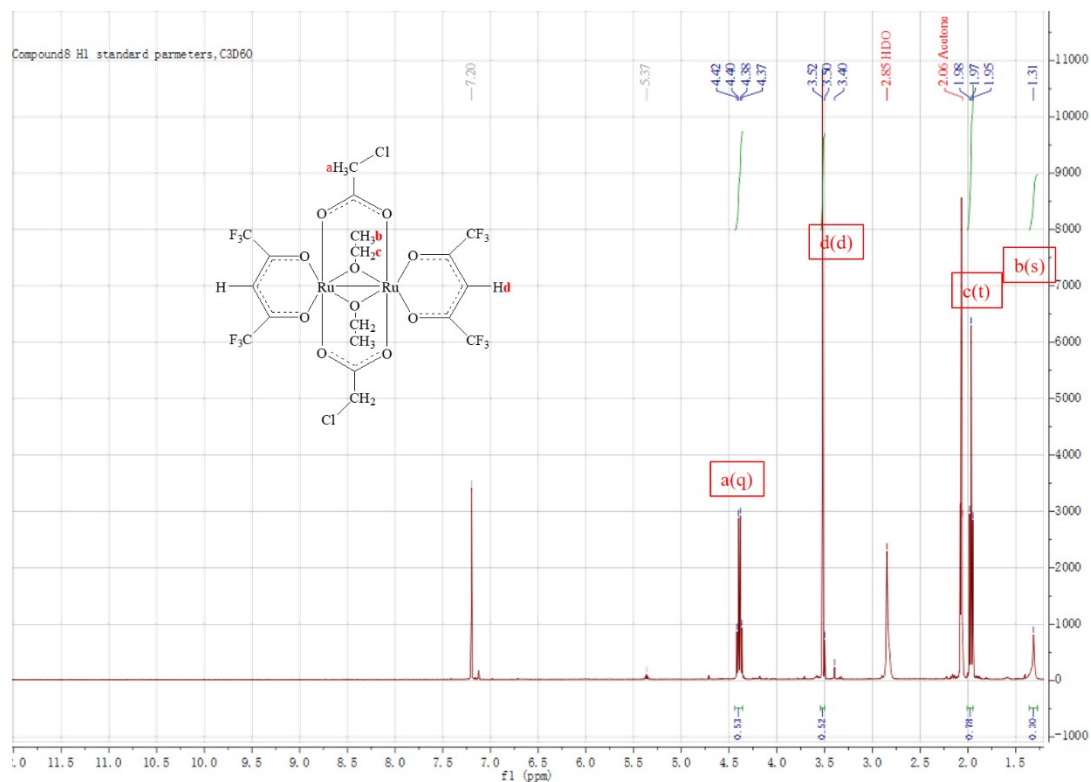

Fig. S4-8 <sup>1</sup>H NMR of **8** in CDCl<sub>3</sub> at 293 K.

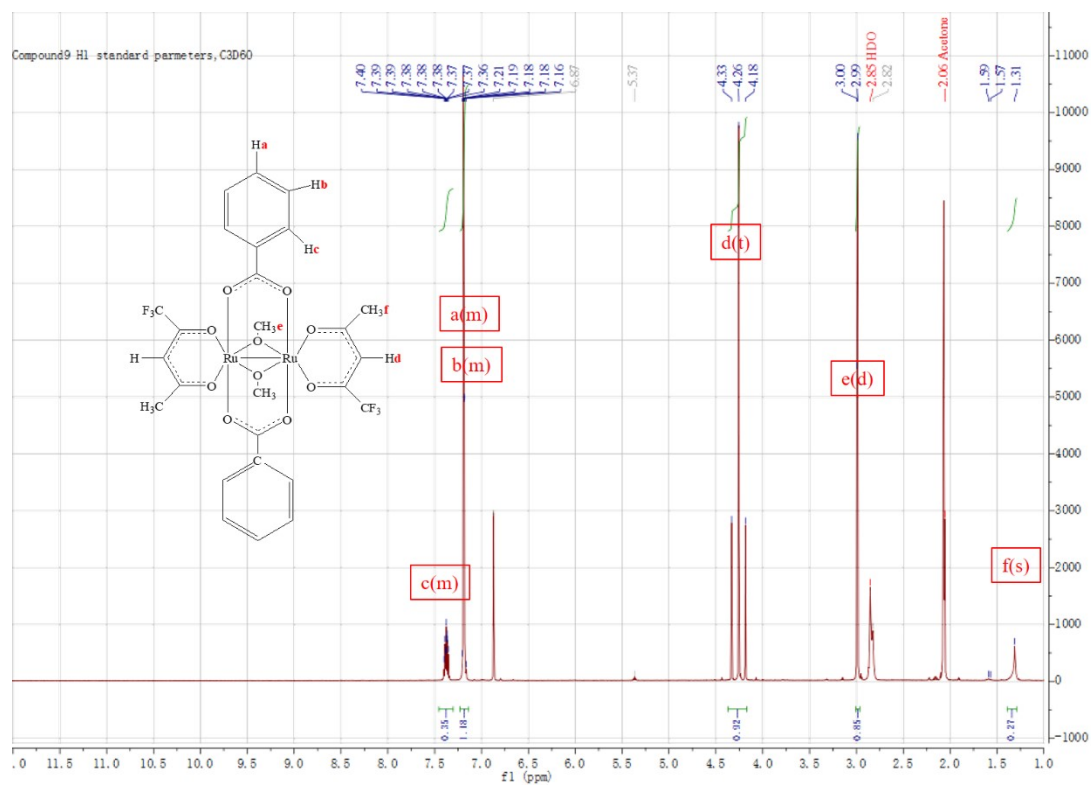

Fig. S4-9 <sup>1</sup>H NMR of **9** in CDCl<sub>3</sub> at 293 K.

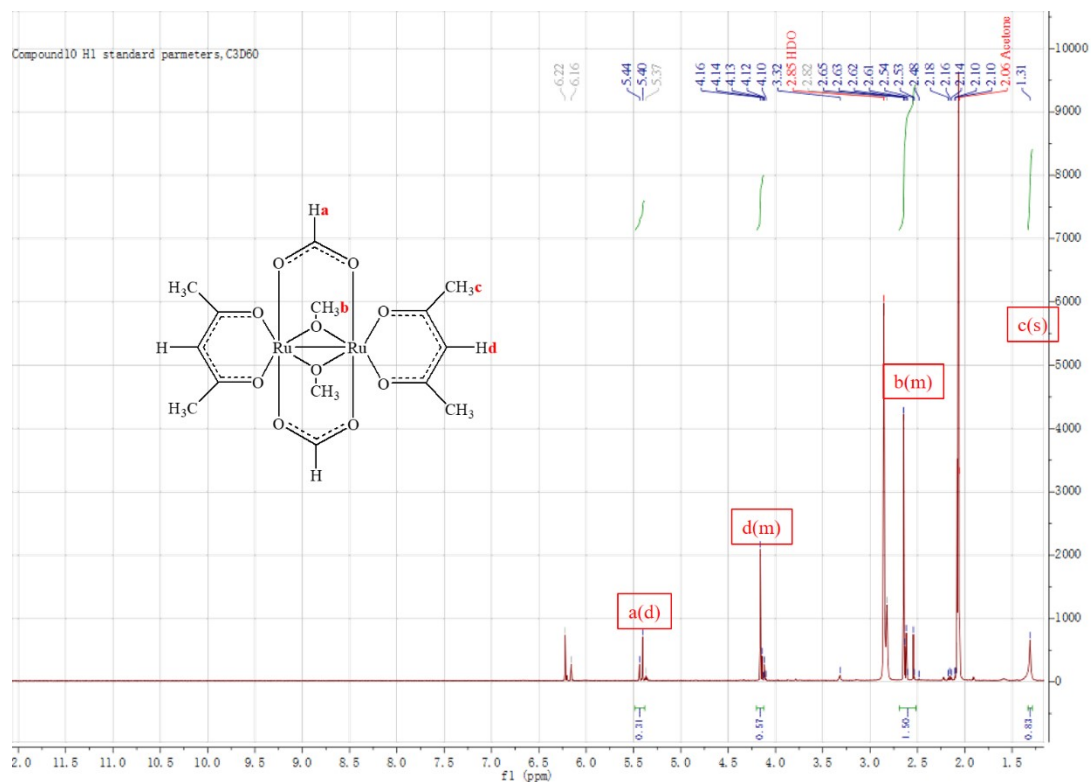

Fig. S4-10  $^1\text{H}$  NMR of **10** in  $\text{CDCl}_3$  at 293 K.

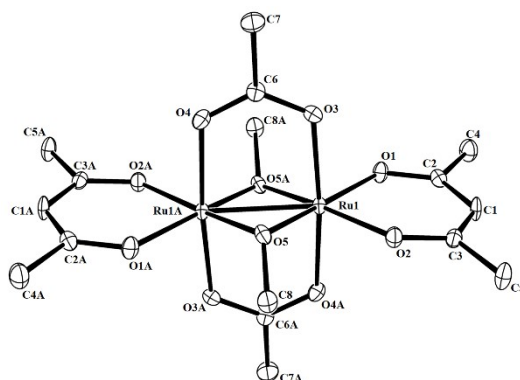

Fig. S5-1 ORTEP representation of the crystal structure of **1**

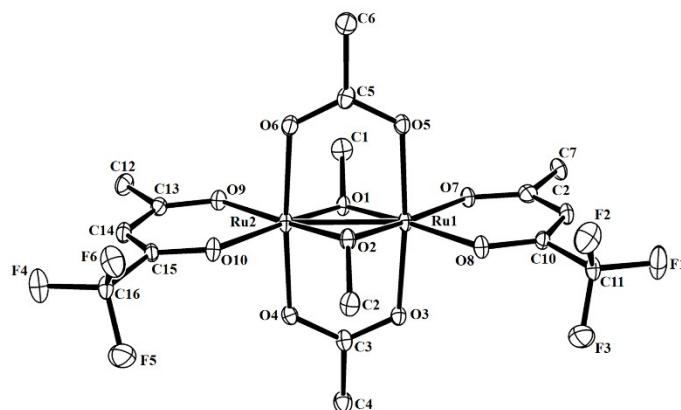

Fig. S5-2 ORTEP representation of the crystal structure of 2

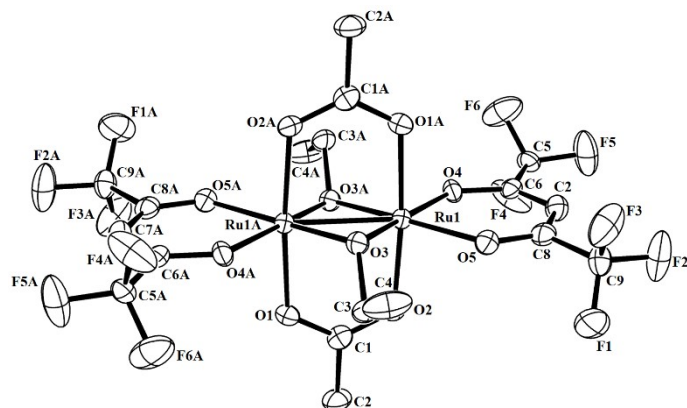

Fig. S5-3 ORTEP representation of the crystal structure of 3

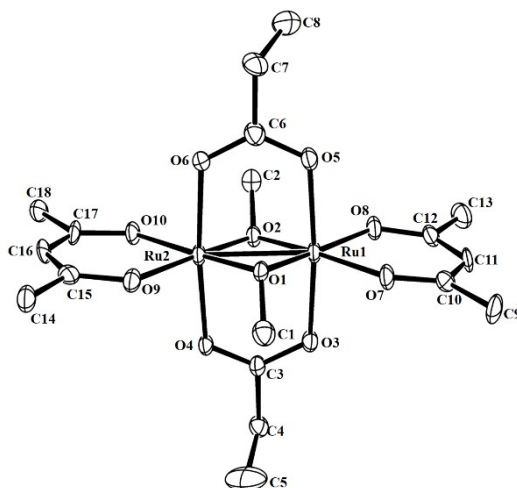

Fig. S5-4 ORTEP representation of the crystal structure of 4

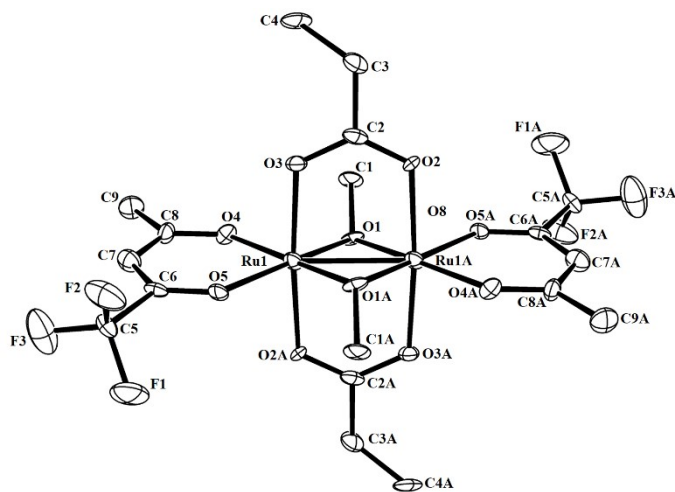

Fig. S5-5 ORTEP representation of the crystal structure of 5

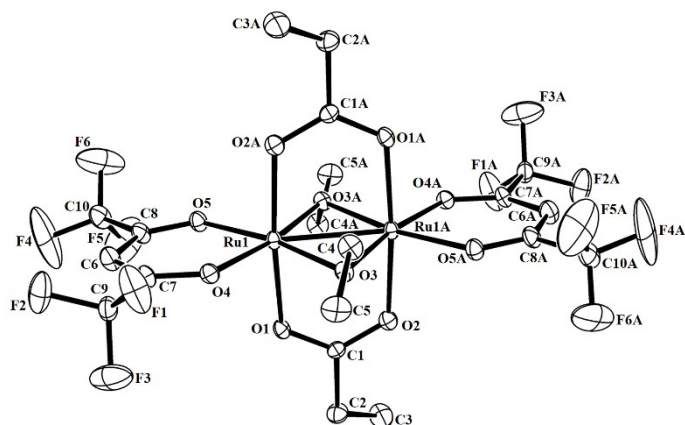

Fig. S5-6 ORTEP representation of the crystal structure of **6**

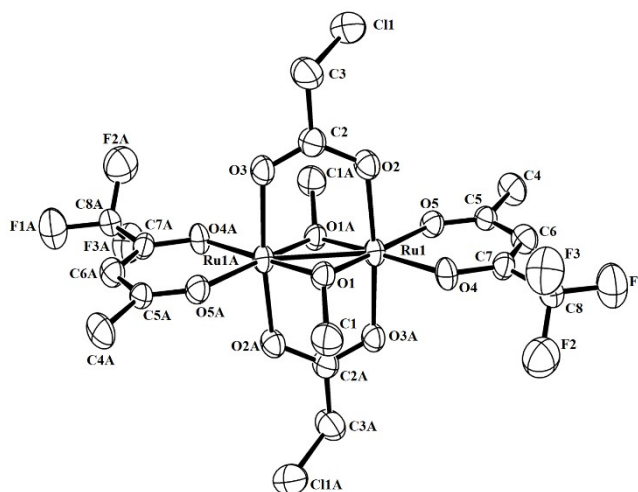

Fig. S5-7 ORTEP representation of the crystal structure of **7**

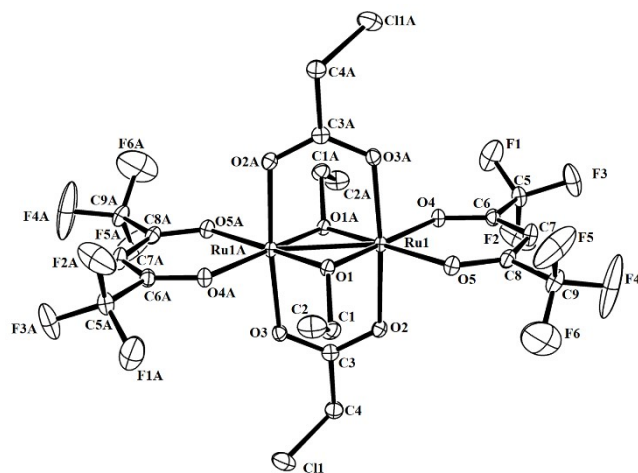

Fig. S5-8 ORTEP representation of the crystal structure of **8**



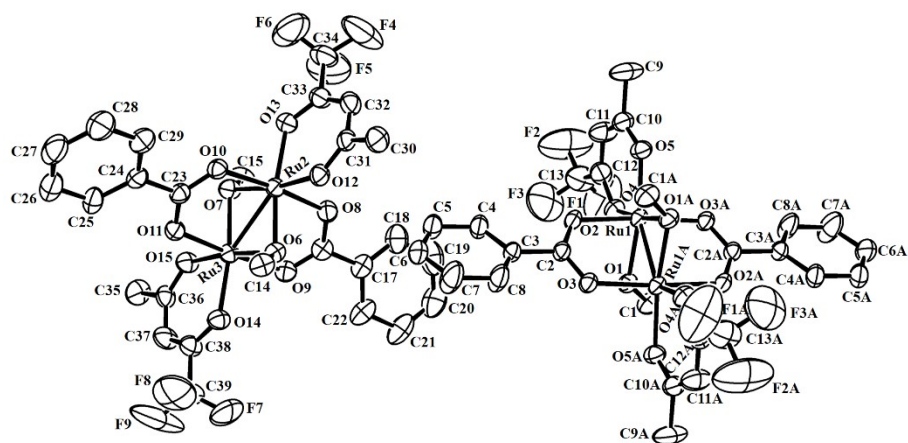

Fig. S5-9 ORTEP representation of the crystal structure of **9**

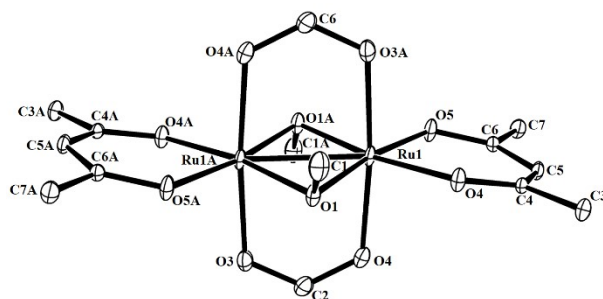

Fig. S5-10 ORTEP representation of the crystal structure of **10**

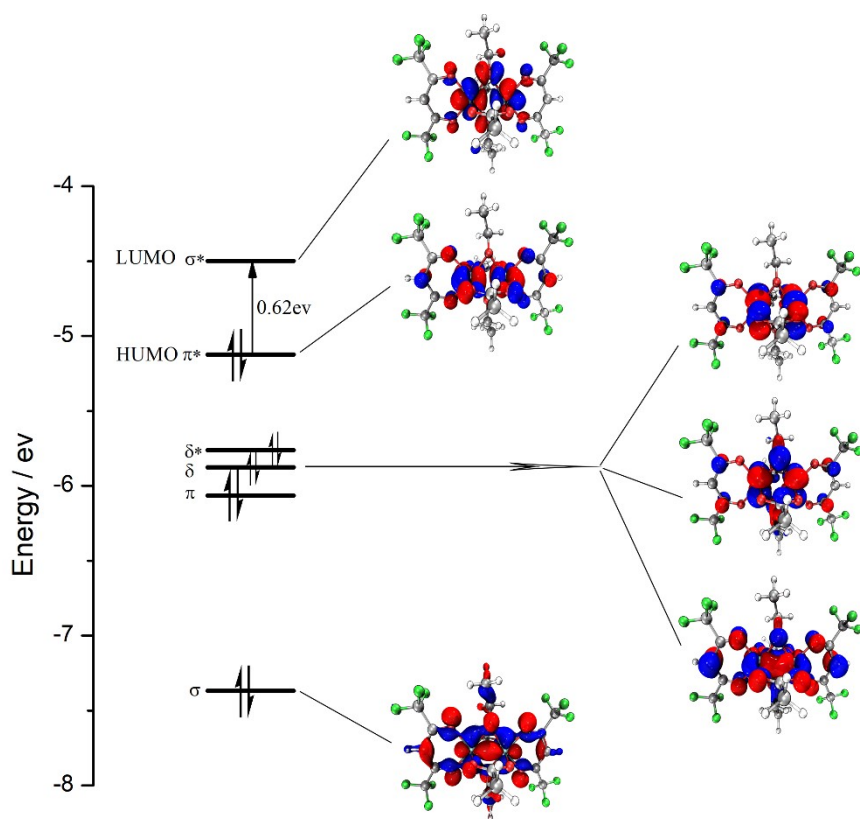

Fig S6-1. Molecular orbital diagrams of **3** with corresponding energies (eV)



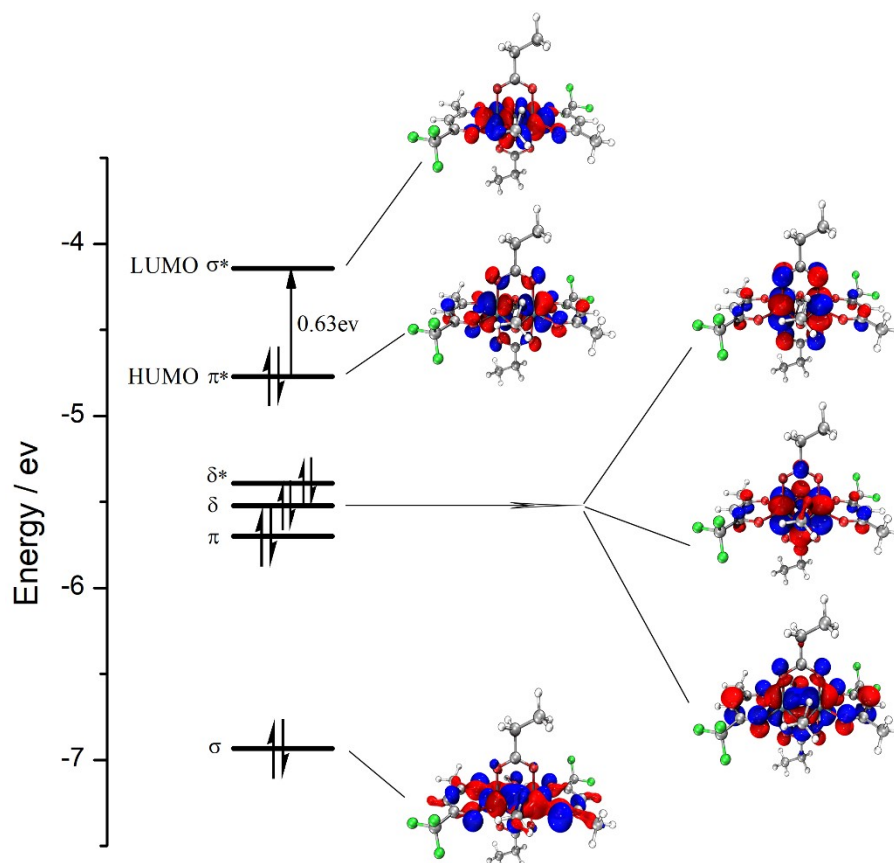

**Fig S6-2.** Molecular orbital diagrams of **5** with corresponding energies (eV)

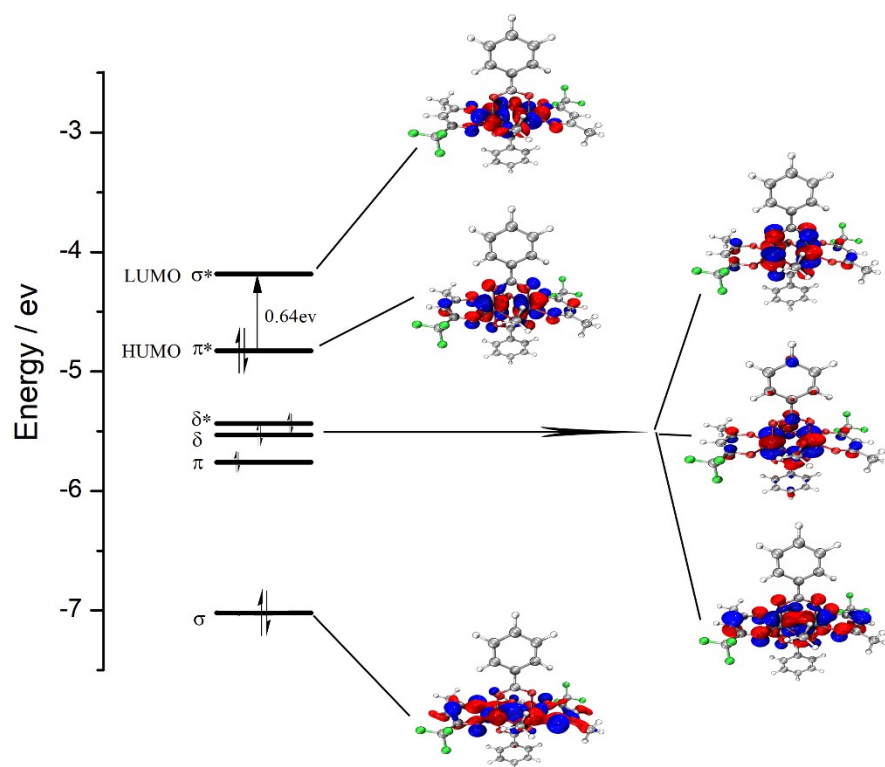

**Fig S6-3.** Molecular orbital diagrams of **9** with corresponding energies (eV)

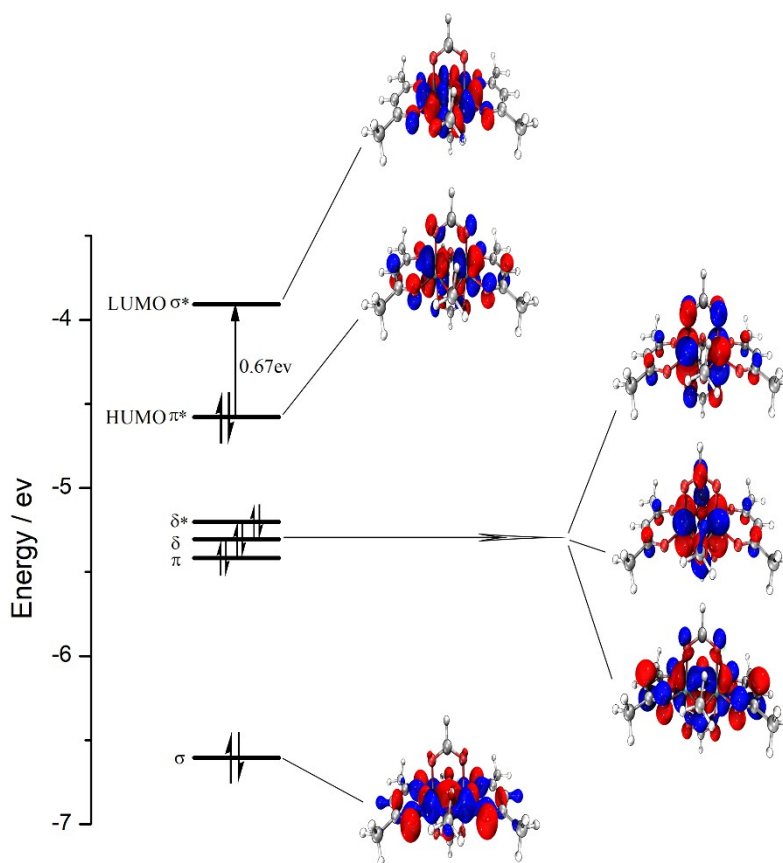

**Fig S6-4.** Molecular orbital diagrams of **10** with corresponding energies (eV)

**Table S3-1.** Selected bond distances (Å) from the experiment and calculation of compound **1**

|              | Exp.     | Calc.   |
|--------------|----------|---------|
| Ru(1)-O(5)A  | 1.998(5) | 2.04976 |
| Ru(1)-O(1)   | 2.021(5) | 2.03610 |
| Ru(1)-O(2)   | 2.020(5) | 2.03610 |
| Ru(1)-O(3)   | 2.081(5) | 2.11362 |
| Ru(1)-O(4)A  | 2.080(5) | 2.11362 |
| Ru(1)-Ru(1)A | 2.476(2) | 2.52291 |

**Table S3-2.** Selected bond distances (Å) from the experiment and calculation of compound **3**

|              | Exp.      | Calc.   |
|--------------|-----------|---------|
| Ru(1)-O(3)A  | 1.991(6)  | 2.03505 |
| Ru(1)-O(4)   | 2.026(6)  | 2.03582 |
| Ru(1)-O(5)   | 2.030(6)  | 2.03423 |
| Ru(1)-O(1)   | 2.065(7)  | 2.10904 |
| Ru(1)-O(2)   | 2.073(7)  | 2.10487 |
| Ru(1)-Ru(1)A | 2.4560(9) | 2.50669 |

**Table S3-3.** Selected bond distances (Å) from the experiment and calculation of compound **5**

|  | Exp. | Calc. |
|--|------|-------|
|--|------|-------|

|              |           |         |
|--------------|-----------|---------|
| Ru(1)-O(1)A  | 1.978(10) | 2.04759 |
| Ru(1)-O(4)   | 2.009(10) | 2.03554 |
| Ru(1)-O(5)   | 2.024(10) | 2.03450 |
| Ru(1)-O(2)A  | 2.067(9)  | 2.10874 |
| Ru(1)-O(3)   | 2.081(10) | 2.11228 |
| Ru(1)-Ru(1)A | 2.450(6)  | 2.51591 |

**Table S3-4.** Selected bond distances (Å) from the experiment and calculation of compound **9**

|              | Exp.       | Calc.   |
|--------------|------------|---------|
| Ru(1)-O(1)A  | 1.991(4)   | 2.04339 |
| Ru(1)-O(5)   | 2.019(4)   | 2.03577 |
| Ru(1)-O(4)   | 2.030(4)   | 2.0349  |
| Ru(1)-O(2)   | 2.065(4)   | 2.10973 |
| Ru(1)-O(3)A  | 2.079(4)   | 2.09795 |
| Ru(1)-Ru(1)A | 2.4650(10) | 2.51502 |

**Table S3-5.** Selected bond distances (Å) from the experiment and calculation of compound **10**

|              | Exp.      | Calc.   |
|--------------|-----------|---------|
| Ru(1)-O(1)A  | 1.999(2)  | 2.04951 |
| Ru(1)-O(5)   | 2.013(2)  | 2.03528 |
| Ru(1)-O(4)   | 2.022(3)  | 2.03467 |
| Ru(1)-O(3)A  | 2.077(2)  | 2.11932 |
| Ru(1)-O(2)   | 2.086(2)  | 2.12349 |
| Ru(1)-Ru(1)A | 2.4771(4) | 2.53223 |

**Table S4** Vibrational frequencies ( $\nu$ ,  $\text{cm}^{-1}$ ) of compounds **3**, **5** and **10**. Experiment data are shown in bold, DFT-computed values in normal.

|           | $\nu(\text{Ru-Ru})$ | $\nu(\text{Ru-O}_a)$ | $\nu(\text{Ru-O}_b)$ | $\nu(\text{Ru-O}_t)$ | $\nu(\text{C-O})$ | $\nu(\text{C-C})$ | $\nu(\text{C-F/H})$ |
|-----------|---------------------|----------------------|----------------------|----------------------|-------------------|-------------------|---------------------|
| <b>3</b>  | <b>358</b>          | <b>320</b>           | <b>605</b>           | <b>150</b>           | <b>1597</b>       | <b>1351</b>       | <b>1598</b>         |
|           | 364                 | 305                  | 574                  | 145                  | 1552              | 1298,1534         | 1448                |
| <b>5</b>  | <b>339</b>          | <b>298</b>           | <b>518</b>           | <b>178</b>           | <b>1599</b>       | <b>1301,1525</b>  | <b>539;1523</b>     |
|           | 338                 | 268                  | 486                  | 169                  | 1566              | 1278,1507         | 511;1423            |
| <b>10</b> | <b>341</b>          | <b>386</b>           | <b>513</b>           | <b>167</b>           | <b>1557</b>       | <b>1283</b>       | <b>674;1369</b>     |
|           | 345                 | 369                  | 484                  | 156                  | 1533              | 1269              | 667;1442            |

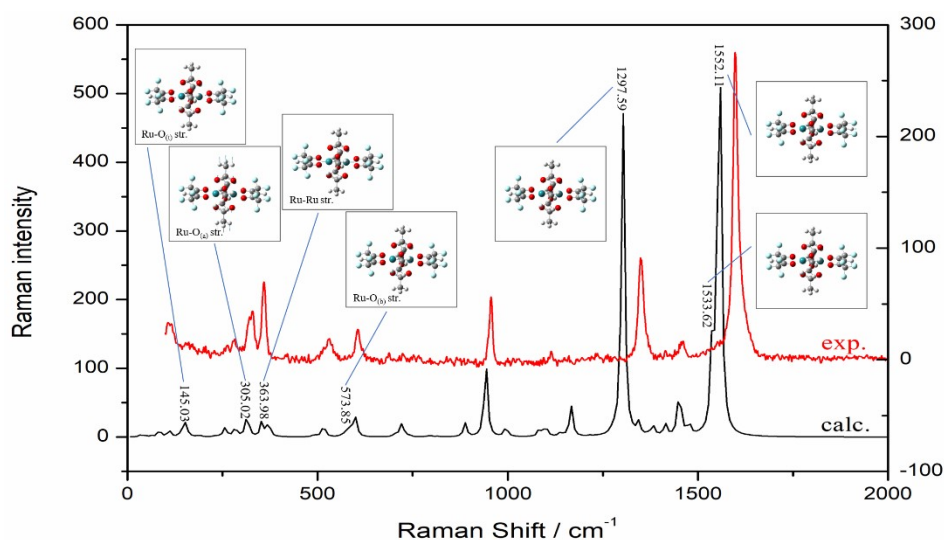

**Fig. S7-1** Experimental and calculated raman spectra for compound **3** (hfac).

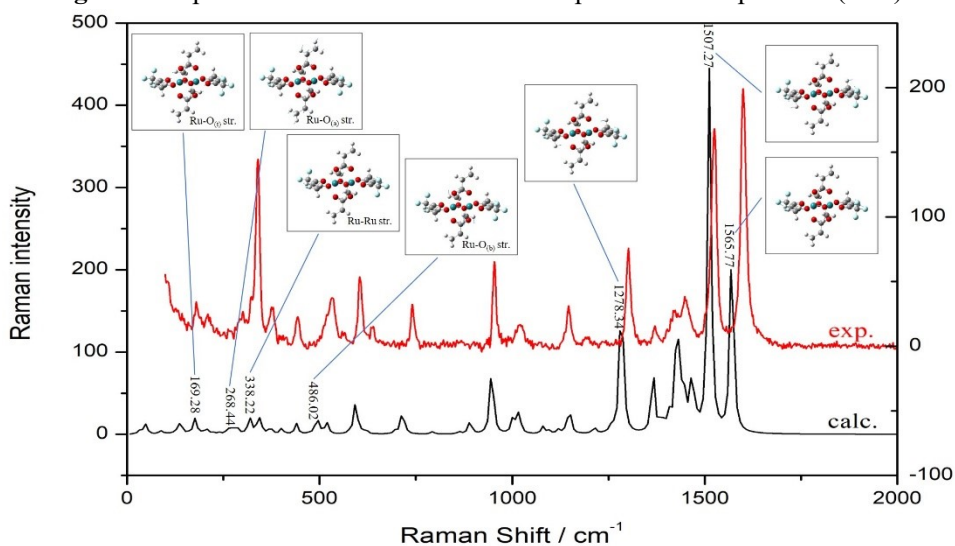

**Fig. S7-2** Experimental and calculated raman spectra for compound **5** (tfac).

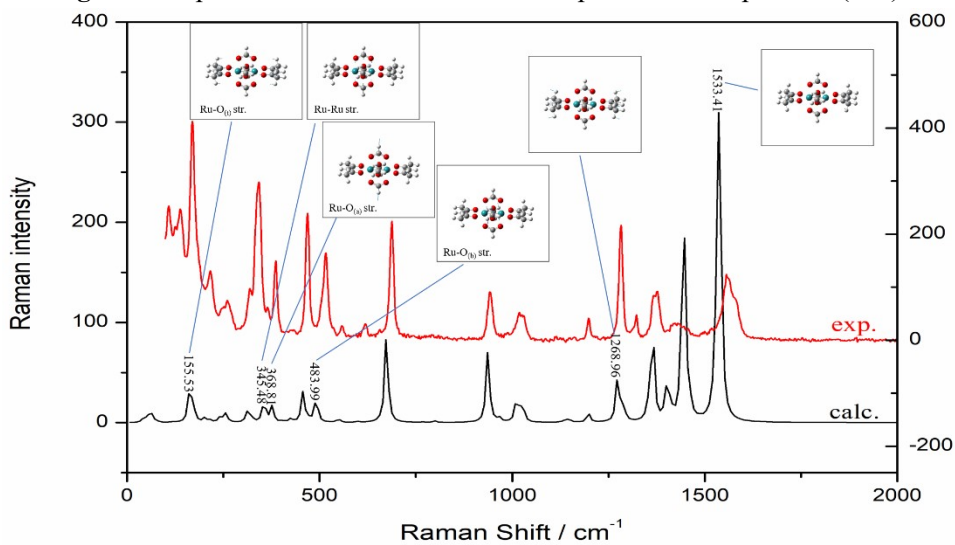

**Fig. S7-3** Experimental and calculated raman spectra for compound **10** (acac).

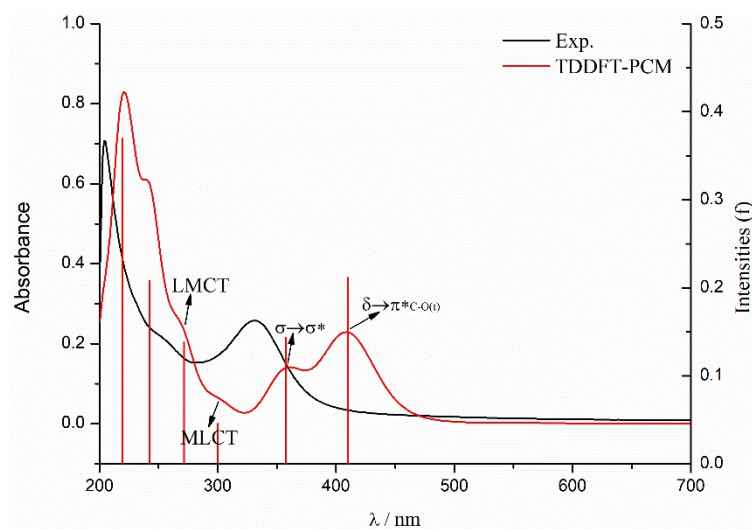

**Fig. S8-1** Experimental and calculated UV-vis spectra for compound 1.

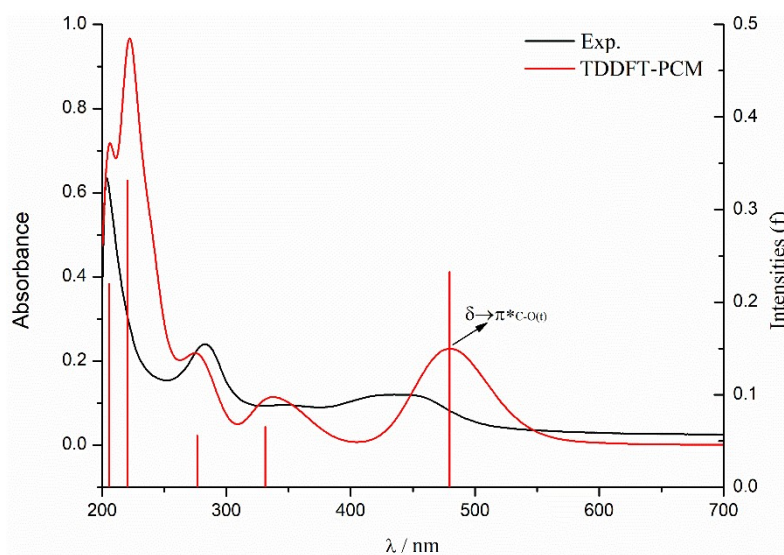

**Fig. S8-2** Experimental and calculated UV-vis spectra for compound 3.

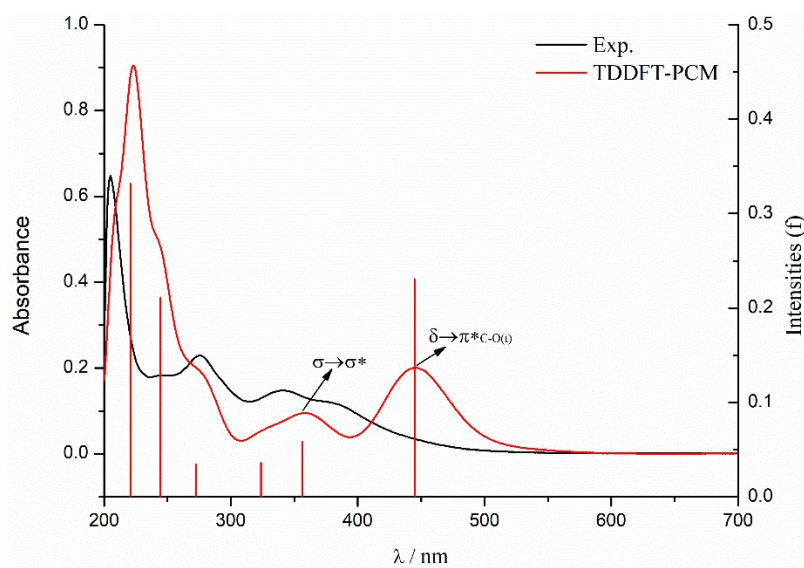

**Fig. S8-3** Experimental and calculated UV-vis spectra for compound 5.



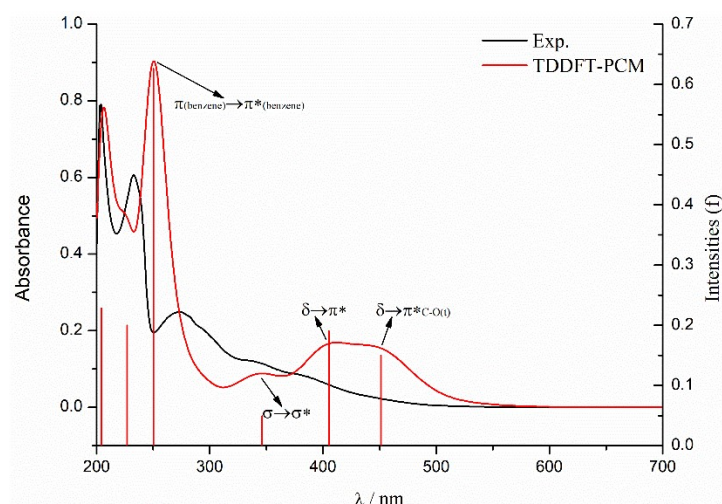

**Fig. S8-4** Experimental and calculated UV-vis spectra for compound **9**.

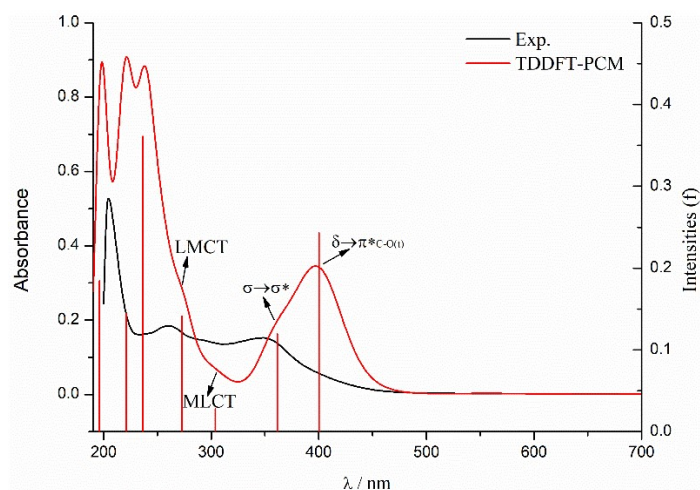

**Fig. S8-5** Experimental and calculated UV-vis spectra for compound **10**.

**Table S5-1** The representative calculated optical transitions for compound **1**

| $\lambda$ (nm) | f      | assign.                                           | %  |
|----------------|--------|---------------------------------------------------|----|
| 409.67         | 0.2118 | $\delta \rightarrow \pi^*_{C-O(t)}$               | 42 |
| 357.56         | 0.1432 | $\sigma \rightarrow \sigma^*$                     | 81 |
| 300.19         | 0.0460 | $\delta \rightarrow \pi^*_{C-O(a)}$               | 96 |
| 271.43         | 0.1384 | $P_{(C/O)} \rightarrow \pi^*$                     | 69 |
| 242.38         | 0.2082 | $\sigma_{Ru-O(a)} \rightarrow \pi^*_{C-O(t)}$     | 25 |
| 217.46         | 0.3695 | $\sigma_{Ru-O(a)} \rightarrow \sigma^*_{Ru-O(a)}$ | 31 |

**Table S5-2.** The representative calculated optical transitions for compound **3**

| $\lambda$ (nm) | f      | assign.                                           | %  |
|----------------|--------|---------------------------------------------------|----|
| 479.66         | 0.2326 | $\delta \rightarrow \pi^*_{C-O(t)}$               | 63 |
| 331.38         | 0.0656 | $\sigma_{Ru-O(b)} \rightarrow \sigma^*$           | 54 |
| 276.61         | 0.0558 | $\sigma_{Ru-O(a)} \rightarrow \sigma^*$           | 19 |
| 220.51         | 0.3315 | $\sigma_{Ru-O} \rightarrow \sigma^*_{Ru-O(a)}$    | 12 |
| 202.68         | 0.2195 | $\sigma_{Ru-O(a)} \rightarrow \sigma^*_{Ru-O(a)}$ | 12 |

**Table S5-3** The representative calculated optical transitions for compound **5**

| $\lambda$ (nm) | f      | assign.                                           | %  |
|----------------|--------|---------------------------------------------------|----|
| 444.78         | 0.2307 | $\delta \rightarrow \pi^*_{C-O(t)}$               | 68 |
| 356.58         | 0.0587 | $\sigma \rightarrow \sigma^*$                     | 43 |
| 323.87         | 0.0361 | $\sigma^*_{Ru-O(b)} \rightarrow \sigma^*$         | 89 |
| 272.65         | 0.0343 | $\sigma \rightarrow \sigma^*_{Ru-O(t)}$           | 32 |
| 244.59         | 0.2110 | $\sigma_{Ru-O(a)} \rightarrow \sigma^*_{Ru-O(t)}$ | 17 |
| 220.81         | 0.3319 | $\sigma_{Ru-O(a)} \rightarrow \sigma^*_{Ru-O(a)}$ | 12 |

**Table S5-4.** The representative calculated optical transitions for compound **9**

| $\lambda$ (nm) | f      | assign.                                           | %  |
|----------------|--------|---------------------------------------------------|----|
| 451.22         | 0.1501 | $\delta \rightarrow \pi^*_{C-O(t)}$               | 43 |
| 405.17         | 0.1906 | $\delta \rightarrow \pi^*$                        | 49 |
| 346.31         | 0.0495 | $\sigma \rightarrow \sigma^*$                     | 28 |
| 250.24         | 0.6262 | $\pi_{(benzene)} \rightarrow \pi^*_{(benzene)}$   | 30 |
| 226.93         | 0.1998 | $\sigma_{Ru-O(t)} \rightarrow \sigma^*_{Ru-O(t)}$ | 27 |
| 204.30         | 0.2289 | $\sigma_{Ru-O(b)} \rightarrow \sigma^*_{Ru-O(a)}$ | 42 |

**Table S5-5.** The representative calculated optical transitions for compound **10**

| $\lambda$ (nm) | f      | assign.                                           | %  |
|----------------|--------|---------------------------------------------------|----|
| 400.15         | 0.2433 | $\delta \rightarrow \pi^*_{C-O(t)}$               | 61 |
| 361.42         | 0.1197 | $\sigma \rightarrow \sigma^*$                     | 71 |
| 303.96         | 0.0281 | $\delta \rightarrow \pi^*_{C-O(a)}$               | 96 |
| 272.68         | 0.1408 | $P_{(C/O)} \rightarrow \pi^*$                     | 78 |
| 236.40         | 0.3611 | $\sigma_{Ru-O(b)} \rightarrow \sigma^*_{Ru-O(a)}$ | 48 |
| 221.14         | 0.1446 | $P_{(O)} \rightarrow \pi$                         | 25 |
| 196.26         | 0.1844 | $\sigma_{Ru-O} \rightarrow \pi$                   | 29 |

**Table S6** The differential pulse voltammograms (DPV) peaks data (E/V) for compounds **1-10**

|   | 1     | 2     | 3     | 4     | 5     | 6     | 7     | 8     | 9     | 10    |
|---|-------|-------|-------|-------|-------|-------|-------|-------|-------|-------|
| A | -0.58 | -0.64 | -0.62 | -0.63 | -0.62 | -0.61 | -0.61 | -0.62 | -0.61 | -0.60 |
| B | 0.90  | 0.82  | 0.85  | 0.84  | 0.86  | 0.85  | 0.86  | 0.86  | 0.88  | 0.86  |
| C | 1.26  | 1.18  | 1.26  | 1.25  | 1.26  | 1.26  | 1.26  | 1.26  | 1.27  | 1.23  |
